# Supplementary material for: Multistep screening of transition-metal-based homonuclear double-atom catalysts to unravel the electronic origin of their activity and selectivity challenges for nitrogen reduction
Source: Royal Society of Chemistry journal article supplement (doi:10.1039/d4cy00480a), 2024-01-01
Supplement: d4cy00480a1.pdf [file d4cy00480a1.pdf]

### Supporting information for

## Multistep screening of transition metal based homonuclear double atom catalysts to unravel the electronic origin of their activity and selectivity challenges for nitrogen reduction.

*Anjumun Rasool<sup>a</sup> and Manzoor Ahmad Dar<sup>a\*</sup>*

*<sup>a</sup> Department of Chemistry, Islamic University of Science and Technology,*

*Awantipora, Jammu and Kashmir-192122, India*

### Table of contents

- 1. Table 1.** Lattice parameters of the optimized unit cells of 3d, 4d and 5d transition metal-based DACs on TCNQ monolayer
- 2. Fig. S1.** Top and side views of the optimised structures of (a) 3d, (b) 4d, and (c) 5d transition metal-based DACs supported on TCNQ catalysts with binding energy values
- 3. Fig. S2.** Computed dissolution potential ( $U_{\text{diss}}$ ) of (a) 3d, (b) 4d and (c) 5d transition metal-based DACs supported on the TCNQ monolayer
- 4. Fig. S3.** Optimized structures (top view) and charge density differences plots of chemisorbed  $N_2$  on (a) 3d, (b) 4d, and (c) 5d DACs. The charge depletion and accumulation are depicted by pink and green colours, respectively. The isosurface value used for plotting the charge density difference plots is  $0.0006 \text{ eA}^{-3}$ . The net Bader charge accumulated on the adsorbed  $N_2$  is depicted using blue arrow in the charge density difference plots.
- 5. Fig. S4.** Optimized side views of  $N_2$  adsorbed structures on the active site of (a) 3d, (b) 4d and (c) 5d transition metal-based DACs
- 6. Fig. S5.** Free energy profile for NRR on  $V_2$  DAC along alternating and distal mechanisms
- 7. Fig. S6.** Free energy profile for NRR on  $Fe_2$  DAC along distal mechanism and on  $Co_2$  catalyst along distal and enzymatic mechanisms
- 8. Fig. S7.** Free energy profile for NRR on  $Ni_2$  DAC along alternating and distal mechanisms

9. **Fig. S8.** Free energy profile for NRR on Nb<sub>2</sub> and La<sub>2</sub> DACs along the enzymatic mechanism
10. **Fig. S9.** Free energy profile for NRR on Hf<sub>2</sub> and Ta<sub>2</sub> DACs along alternating, distal and enzymatic mechanisms
11. **Fig. S10.** Free energy profile for NRR on W<sub>2</sub> DAC along distal and enzymatic mechanisms and on Re<sub>2</sub> DAC along alternate and distal mechanisms
12. **Fig. S11.** Optimized truncated side views of NRR intermediates on (a) V<sub>2</sub> and (b) Fe<sub>2</sub> DACs along alternating and distal mechanisms. Pink and green coloured arrows indicate alternating and distal mechanisms respectively
13. **Fig. S12.** Optimized truncated side views of NRR intermediates on Co<sub>2</sub> DAC along alternating, distal, and enzymatic mechanisms. Pink, green, and purple-coloured arrows indicate alternating, distal, and enzymatic mechanisms respectively
14. **Fig. S13.** Optimized truncated side views of NRR intermediates on Ni<sub>2</sub> DAC along alternating and distal mechanisms. Pink and green coloured arrows indicate alternating and distal mechanisms respectively
15. **Fig. S14.** Optimized truncated side views of NRR intermediates on (a) Nb<sub>2</sub> and (b) La<sub>2</sub> DACs along enzymatic mechanisms
16. **Fig. S15.** Optimized truncated side views of NRR intermediates on (a) Hf<sub>2</sub> (b) Ta<sub>2</sub> and (c) W<sub>2</sub> DACs along alternating, distal, and enzymatic mechanisms. Pink, green, and purple-coloured arrows indicate alternating, distal, and enzymatic mechanisms respectively.
17. **Fig. S16.** Optimized truncated side views of NRR intermediates on Re<sub>2</sub> DAC along alternating and distal mechanisms. Pink and green coloured arrows indicate alternating and distal mechanisms respectively.
18. **Fig. S17.** Free energy changes for adsorption of the NRR intermediates (\*N<sub>2</sub>, \*N<sub>2</sub>H, \*N<sub>2</sub>H<sub>2</sub>, \*N<sub>2</sub>H<sub>3</sub>, \*N<sub>2</sub>H<sub>4</sub>, \*NH<sub>2</sub> and \*NH<sub>3</sub>) on the screened DACs: plotted as a function of total transition metal dimer d- states near Fermi level (-3.0 to 3.0 eV). The data points from left to right are for La<sub>2</sub>, Nb<sub>2</sub>, Hf<sub>2</sub>, Ta<sub>2</sub>, V<sub>2</sub>, W<sub>2</sub>, Re<sub>2</sub>, Fe<sub>2</sub>, Ni<sub>2</sub> and Co<sub>2</sub> catalysts respectively. Solid lines are the fitted linear relation between free energies and total d-states of the intermediates, with the slope and intercept shown in the plot.
19. **Fig. S18.** The correlations between (a) adsorption energies of N<sub>2</sub> ( $\Delta E_{*N_2}$ ) and NNH ( $\Delta E_{*NNH}$ ), (b) adsorption energies of NH<sub>2</sub> ( $\Delta E_{*NH_2}$ ) and NH<sub>3</sub> ( $\Delta E_{*NH_3}$ ) intermediates adsorbed on screened out DACs.

- 20. Fig. S19.** The scaling relationships for free energy of (a)  $^*N_2H$  vs  $^*N_2$ , (b)  $^*N_2H_2$  vs  $^*N_2$ , (c)  $^*N_2H_3$  vs  $^*N_2$ , (d)  $^*N_2H_4$  vs  $^*N_2$ , (e)  $^*NH_2$  vs  $^*N_2$ , and (f)  $^*NH_3$  vs  $^*N$  (NRR intermediates on the screened DACs).
- 21. Fig. S20.** The projected density of states (PDOS) of (i) 3d, (ii) 4d, and (iii) 5d transition metal-based DACs. The PDOS of the total, TM-d, N-2p, C-2p and H-1s is plotted in grey, pink, dark green, blue and cyan colours, respectively.
- 22. Fig. S21.** Computed crystal orbital Hamilton populations (COHPs) and respective orbital projected density of states (oPDOS) for the direct interaction between  $M_2-N$  bonds of the  $N_2$  adsorbed on the screened DACs. The bonding and antibonding states in COHP are depicted by blue and red, respectively. Plots representing the correlation between (a) the calculated integrated crystal Hamilton population (ICOHP) of the bond between screened DACs and N atom/atoms of adsorbed  $^*N_2$  molecule and N-N bond length. (b) the calculated ICOHP of the bond between screened DACs and N atom/atoms of adsorbed  $^*N_2$  molecule and free energy change for  $^*N_2$  adsorption ( $\Delta G_{^*N_2}$ ) (c) the calculated ICOHP of N-N bond on screened DACs and N-N bond length
- 23. Fig. S22.** The crystal orbital Hamilton population (COHP) of N–N bond of  $N_2$  on the screened DACs. The bonding and antibonding states in COHP are depicted by blue and red, respectively.
- 24. Table S2.** Energy, ZPE, TS, G and  $\Delta G$  of reaction steps of NRR on  $V_2$ ,  $Fe_2$  and  $Ni_2$  DACs along alternating and distal mechanisms
- 25. Table S3.** Energy, ZPE, TS, G and  $\Delta G$  of reaction steps of NRR on  $Co_2$  DAC along alternating, distal and enzymatic mechanisms
- 26. Table S4.** Energy, ZPE, TS, G and  $\Delta G$  of reaction steps of NRR on  $Nb_2$  and  $La_2$  DACs along the enzymatic mechanism
- 27. Table S5.** Energy, ZPE, TS, G and  $\Delta G$  of reaction steps of NRR on  $Hf_2$ ,  $Ta_2$  and  $W_2$  DACs along alternating, distal and enzymatic mechanisms
- 28. Table S6.** Energy, ZPE, TS, G and  $\Delta G$  of reaction steps of NRR on  $Re_2$  DAC along alternating and distal mechanisms

**Table S1:** Lattice parameters of the optimized unit cells of 3d, 4d and 5d transition metal-based DACs on TCNQ monolayer.

| System                     | Lattice parameters    |                     |                      |
|----------------------------|-----------------------|---------------------|----------------------|
| <b>Sc<sub>2</sub>@TCNQ</b> | a=6.30 Å              | b=12.31 Å           | c=4.47 Å             |
|                            | $\alpha=114.47^\circ$ | $\beta=45.65^\circ$ | $\gamma=93.04^\circ$ |
| <b>Ti<sub>2</sub>@TCNQ</b> | a=8.44 Å              | b=11.37 Å           | c=13.49 Å            |
|                            | $\alpha=89.83^\circ$  | $\beta=90.22^\circ$ | $\gamma=89.86^\circ$ |
| <b>V<sub>2</sub>@TCNQ</b>  | a=8.21 Å              | b=11.32 Å           | c=15.11 Å            |
|                            | $\alpha=89.88^\circ$  | $\beta=90.00^\circ$ | $\gamma=89.64^\circ$ |
| <b>Cr<sub>2</sub>@TCNQ</b> | a=8.09 Å              | b=11.38 Å           | c=6.41 Å             |
|                            | $\alpha=88.89^\circ$  | $\beta=89.91^\circ$ | $\gamma=89.88^\circ$ |
| <b>Mn<sub>2</sub>@TCNQ</b> | a=7.89 Å              | b=12.67 Å           | c=13.90 Å            |
|                            | $\alpha=91.35^\circ$  | $\beta=90.18^\circ$ | $\gamma=89.95^\circ$ |
| <b>Fe<sub>2</sub>@TCNQ</b> | a=8.13 Å              | b=11.28 Å           | c=13.65 Å            |
|                            | $\alpha=90.24^\circ$  | $\beta=90.23^\circ$ | $\gamma=89.58^\circ$ |
| <b>Co<sub>2</sub>@TCNQ</b> | a=8.04 Å              | b=10.97 Å           | c=13.35 Å            |
|                            | $\alpha=89.13^\circ$  | $\beta=90.22^\circ$ | $\gamma=90.00^\circ$ |
| <b>Ni<sub>2</sub>@TCNQ</b> | a=8.07 Å              | b=11.12 Å           | c=15.01 Å            |
|                            | $\alpha=90.99^\circ$  | $\beta=89.80^\circ$ | $\gamma=89.90^\circ$ |
| <b>Cu<sub>2</sub>@TCNQ</b> | a=8.13 Å              | b=11.34 Å           | c=13.14 Å            |
|                            | $\alpha=90.24^\circ$  | $\beta=89.25^\circ$ | $\gamma=94.47^\circ$ |
| <b>Y<sub>2</sub>@TCNQ</b>  | a=8.60 Å              | b=11.72 Å           | c=6.94 Å             |
|                            | $\alpha=89.80^\circ$  | $\beta=90.58^\circ$ | $\gamma=89.87^\circ$ |
| <b>Zr<sub>2</sub>@TCNQ</b> | a=8.60 Å              | b=11.72 Å           | c=6.94 Å             |
|                            | $\alpha=89.80^\circ$  | $\beta=90.58^\circ$ | $\gamma=89.87^\circ$ |
| <b>Nb<sub>2</sub>@TCNQ</b> | a=8.62 Å              | b=11.31 Å           | c=14.70 Å            |
|                            | $\alpha=90.57^\circ$  | $\beta=90.14^\circ$ | $\gamma=89.77^\circ$ |

|                            |                                                                          |
|----------------------------|--------------------------------------------------------------------------|
| <b>Tc<sub>2</sub>@TCNQ</b> | a= 7.93 Å   b= 11.49 Å   c= 4.18 Å<br>α= 62.11°   β= 119.87°   γ= 88.58° |
| <b>Mo<sub>2</sub>@TCNQ</b> | a= 8.47 Å   b= 11.57 Å   c= 14.77 Å<br>α= 89.72°   β= 90.07°   γ= 89.57° |
| <b>Ru<sub>2</sub>@TCNQ</b> | a=8.60 Å   b=11.72 Å   c=6.94 Å<br>α=89.80°   β= 90.58°   γ=89.87°       |
| <b>Rh<sub>2</sub>@TCNQ</b> | a= 8.41 Å   b= 10.96 Å   c= 5.93 Å<br>α= 87.64°   β= 89.15°   γ= 89.97°  |
| <b>Pd<sub>2</sub>@TCNQ</b> | a= 7.99 Å   b= 10.74 Å   c= 4.55 Å<br>α= 53.98°   β= 118.09°   γ= 87.09° |
| <b>Ag<sub>2</sub>@TCNQ</b> | a=8.60 Å   b=11.72 Å   c=6.94 Å<br>α=89.80°   β= 90.58°   γ=89.87°       |
| <b>La<sub>2</sub>@TCNQ</b> | a=7.52 Å   b=10.97 Å   c=4.14 Å<br>α=71.07°   β=132.08°   γ=115.92°      |
| <b>Hf<sub>2</sub>@TCNQ</b> | a=7.44 Å   b=13.04 Å   c=4.14 Å<br>α=117.40°   β=114.11°   γ=92.75°      |
| <b>Ta<sub>2</sub>@TCNQ</b> | a=7.76 Å   b=12.10 Å   c=4.10 Å<br>α=63.63°   β= 116.91°   γ=90.02°      |
| <b>W<sub>2</sub>@TCNQ</b>  | a=7.65 Å   b=10.28 Å   c=4.15 Å<br>α=82.22°   β= 135.48°   γ=96.21°      |
| <b>Re<sub>2</sub>@TCNQ</b> | a=7.73 Å   b=10.47 Å   c=3.85 Å<br>α=69.92°   β=47.79°   γ=84.21°        |
| <b>Os<sub>2</sub>@TCNQ</b> | a=8.03 Å   b=10.16 Å   c=3.92 Å<br>α=80.58°   β=45.15°   γ= 90.32°       |
| <b>Ir<sub>2</sub>@TCNQ</b> | a=8.41 Å   b=10.87 Å   c=5.04 Å<br>α=88.30°   β= 90.22°   γ=90.22°       |
| <b>Pt<sub>2</sub>@TCNQ</b> | a=8.44 Å   b=10.47 Å   c=4.25 Å<br>α=69.69°   β=48.19°   γ=88.42°        |

|                            |          |           |          |
|----------------------------|----------|-----------|----------|
| <b>Au<sub>2</sub>@TCNQ</b> | a=8.54 Å | b=11.70 Å | c=5.98 Å |
|                            | α=90.91° | β= 91.08° | γ=89.78° |

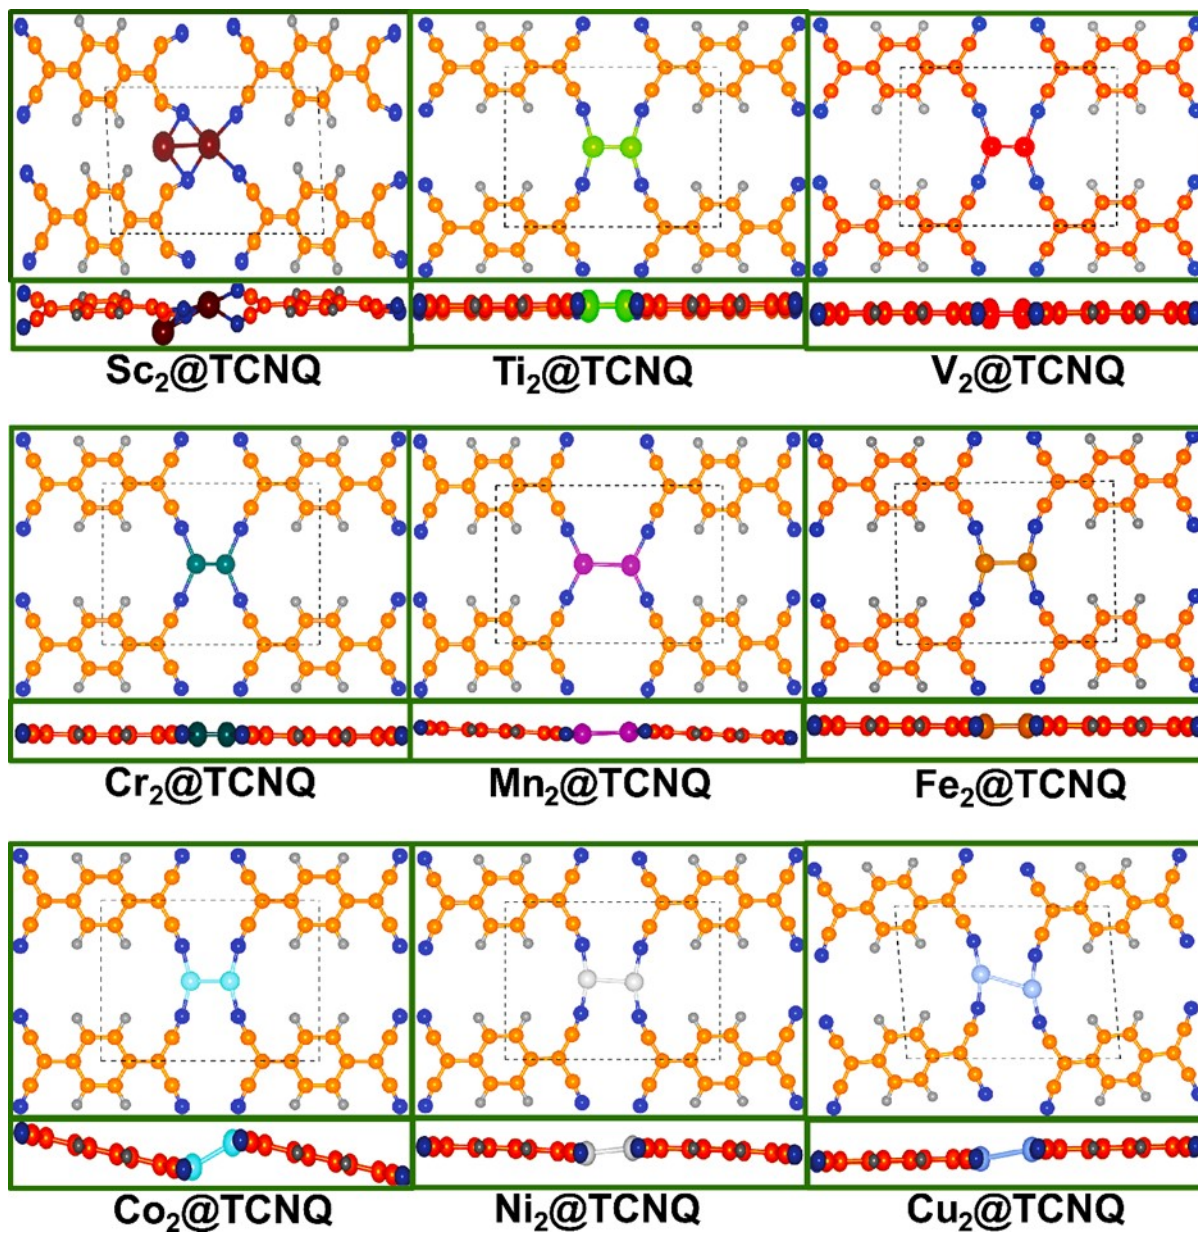

(a)

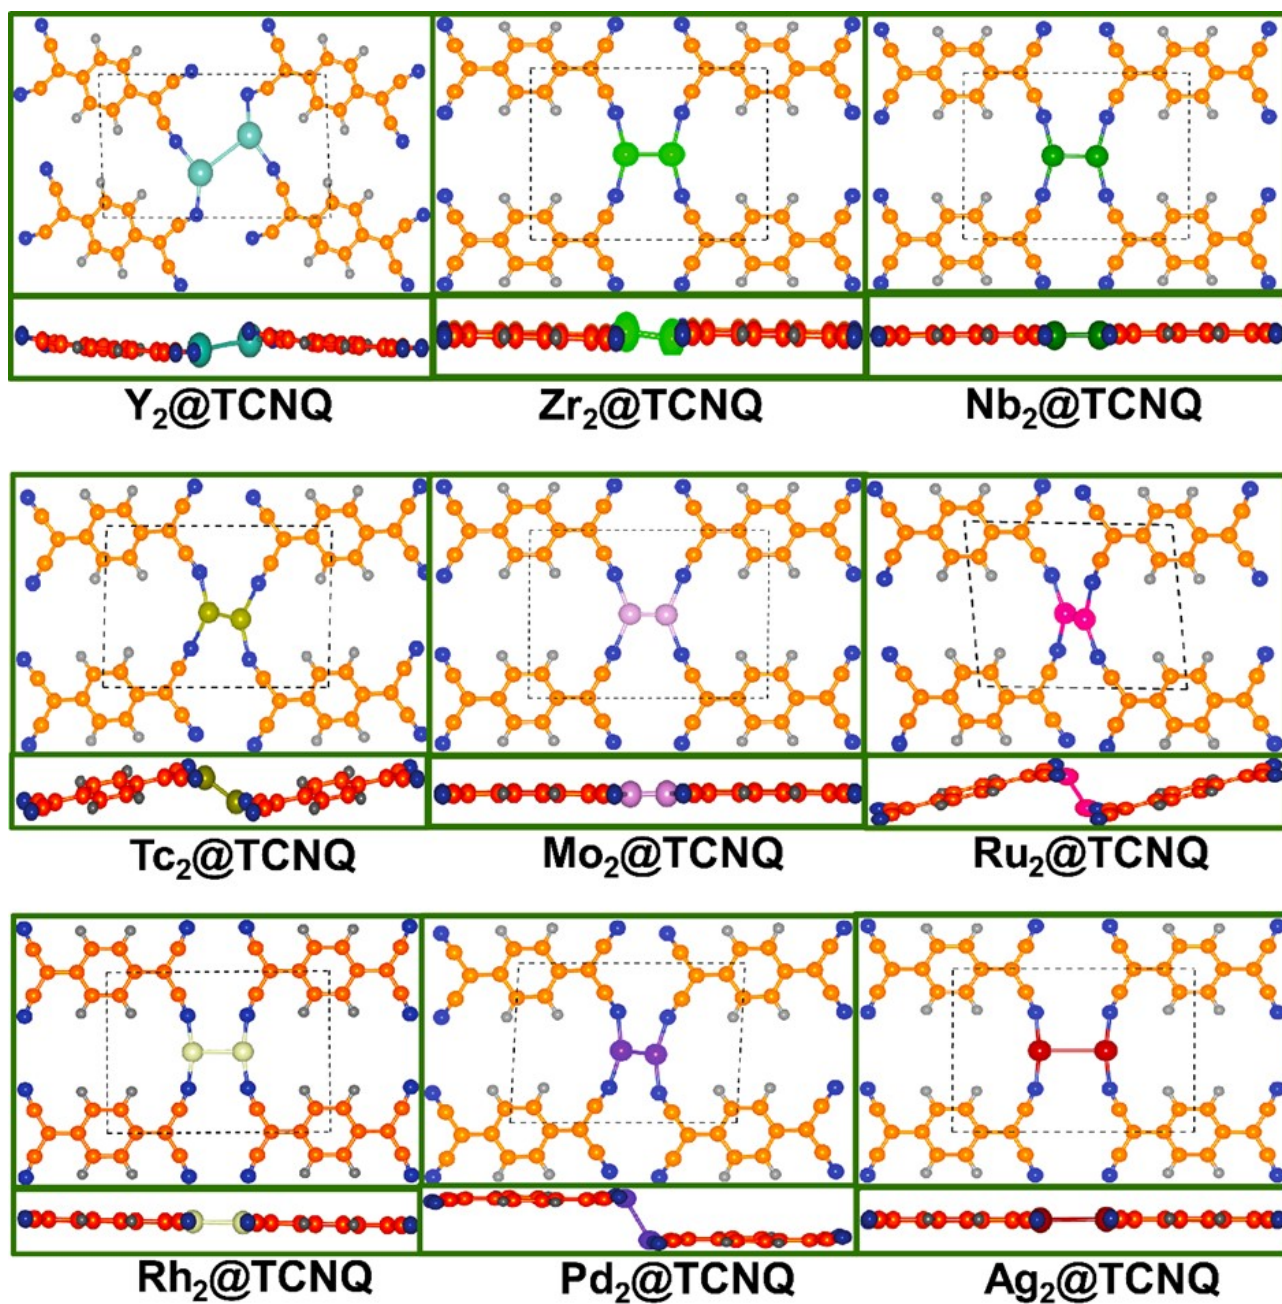

(b)

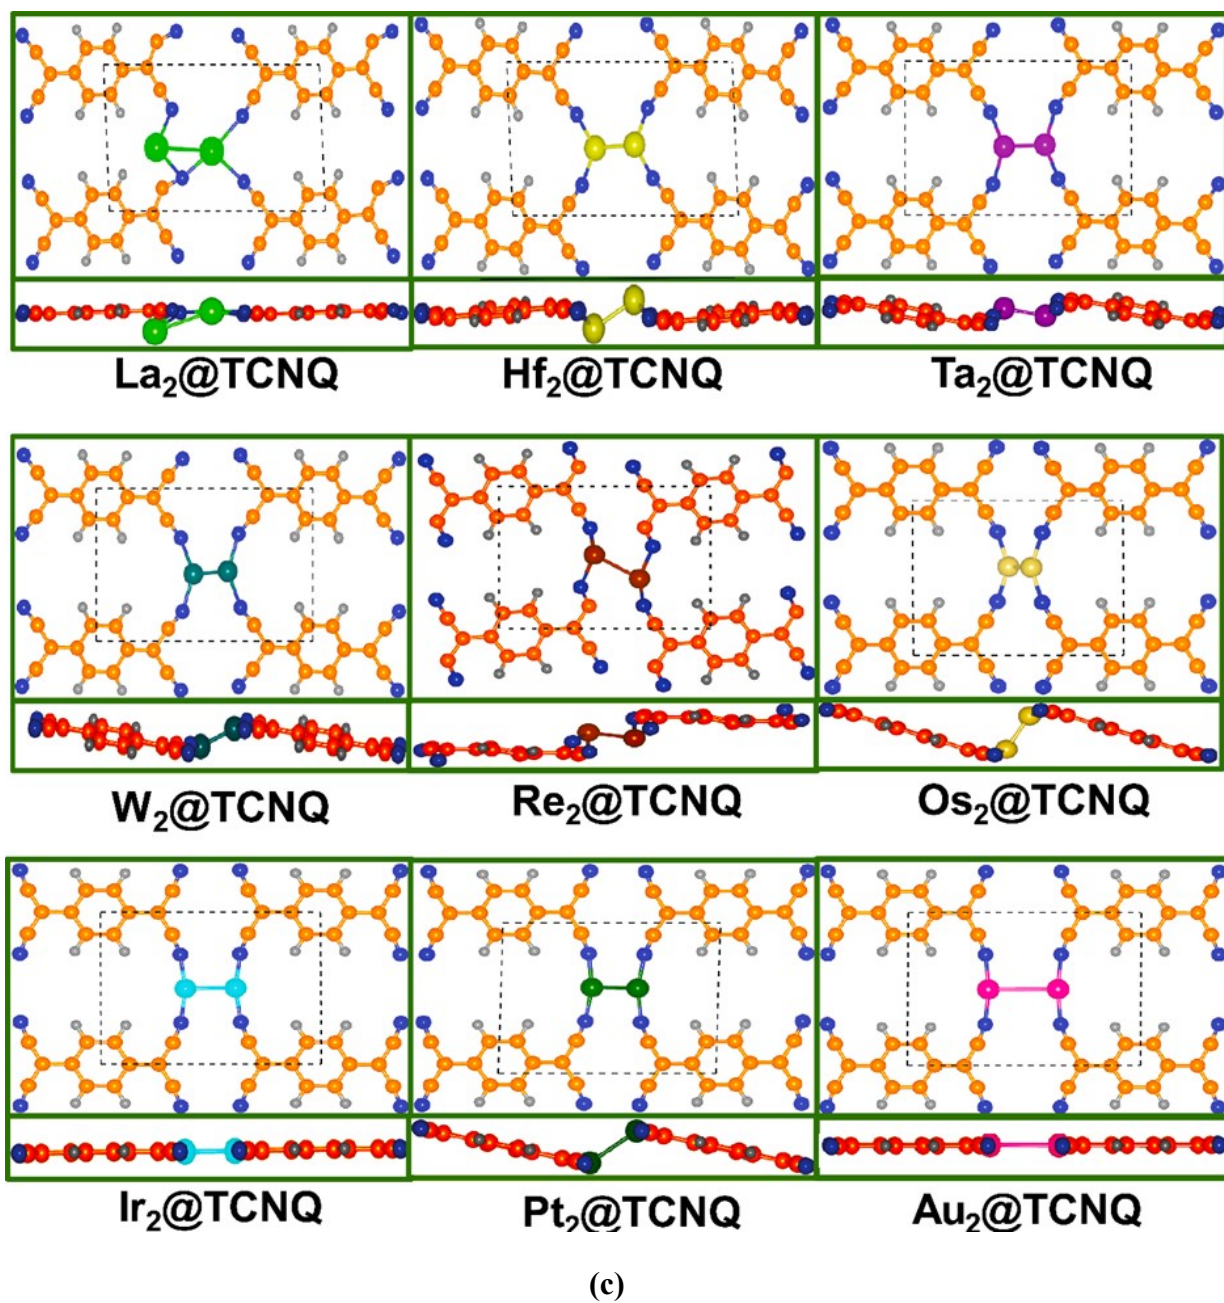

**Fig. S1.** Top and side views of the optimised structures of (a) 3d, (b) 4d, and (c) 5d transition metal-based DACs supported on TCNQ monolayer with binding energy values.



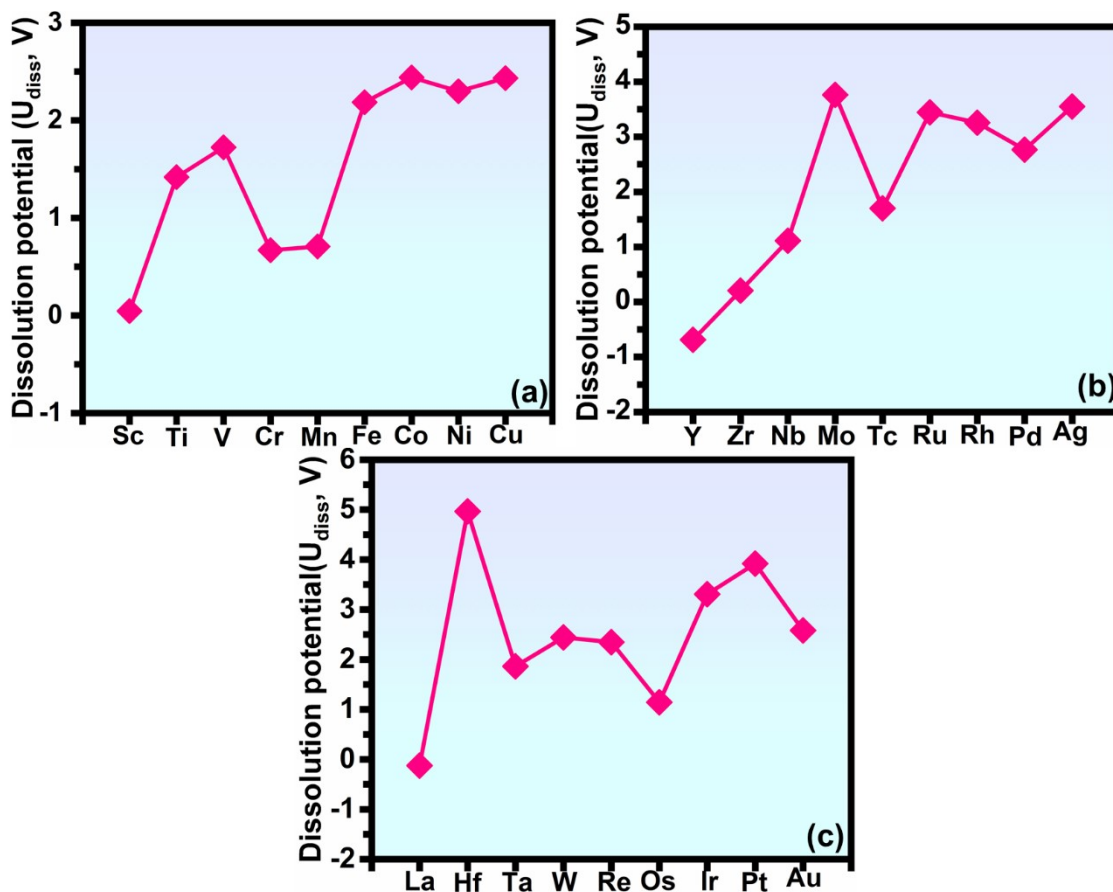

**Fig. S2.** Computed dissolution potential ( $U_{\text{diss}}$ ) of (a) 3d, (b) 4d and (c) 5d transition metal-based DACs supported on the TCNQ monolayer

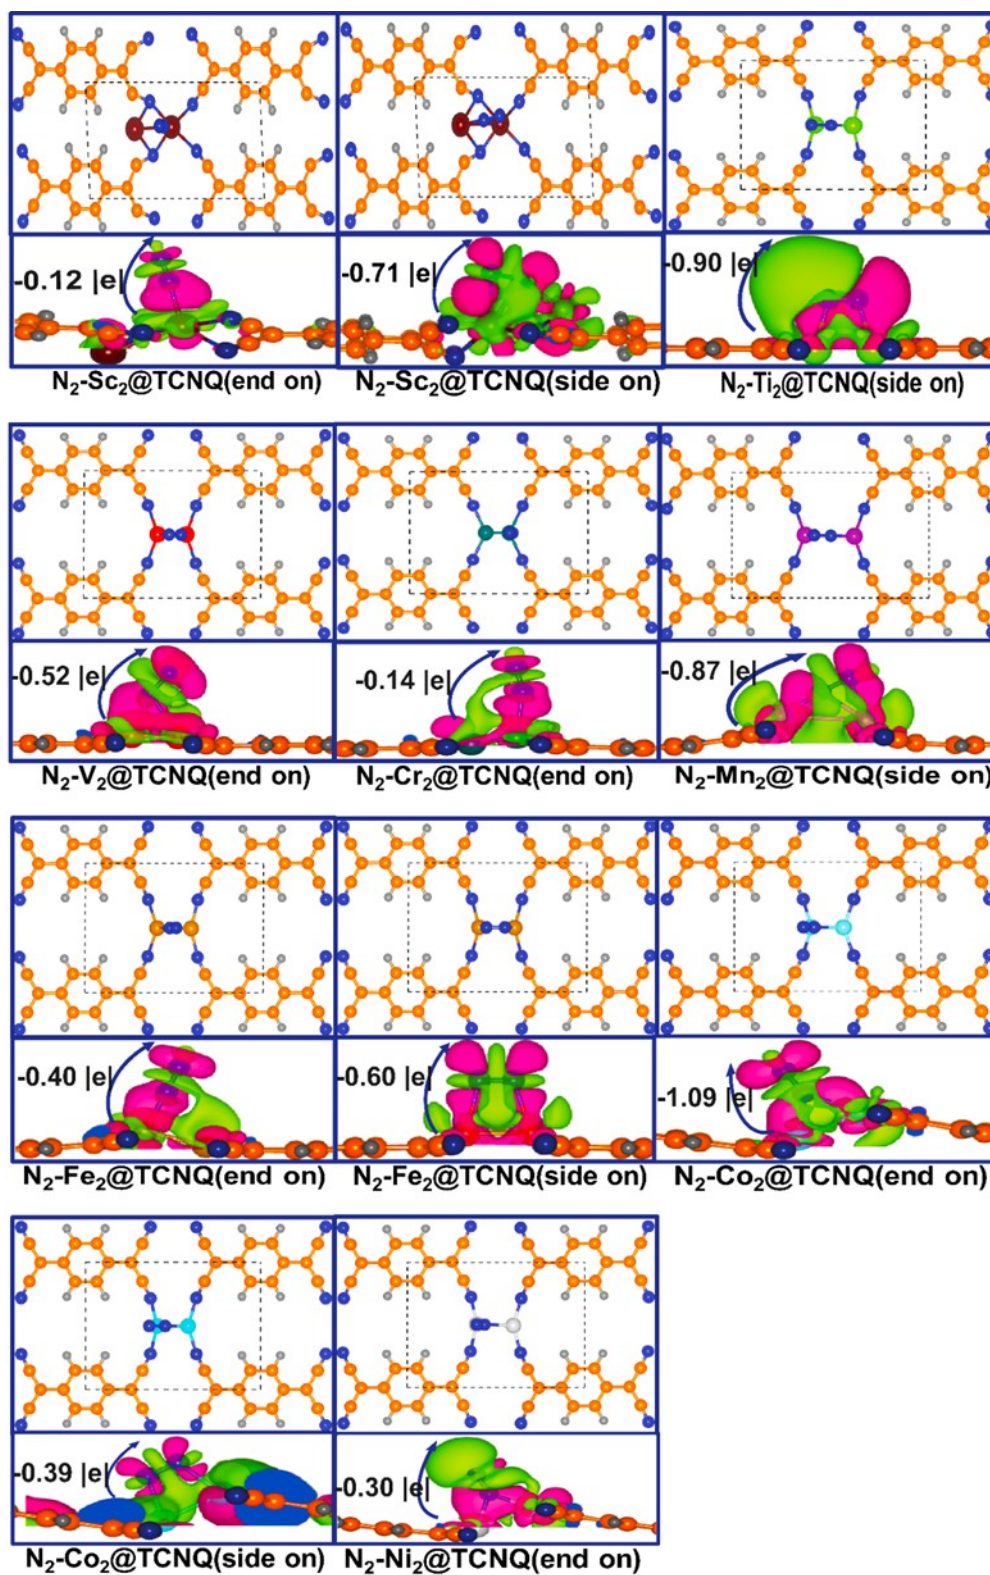

(a)

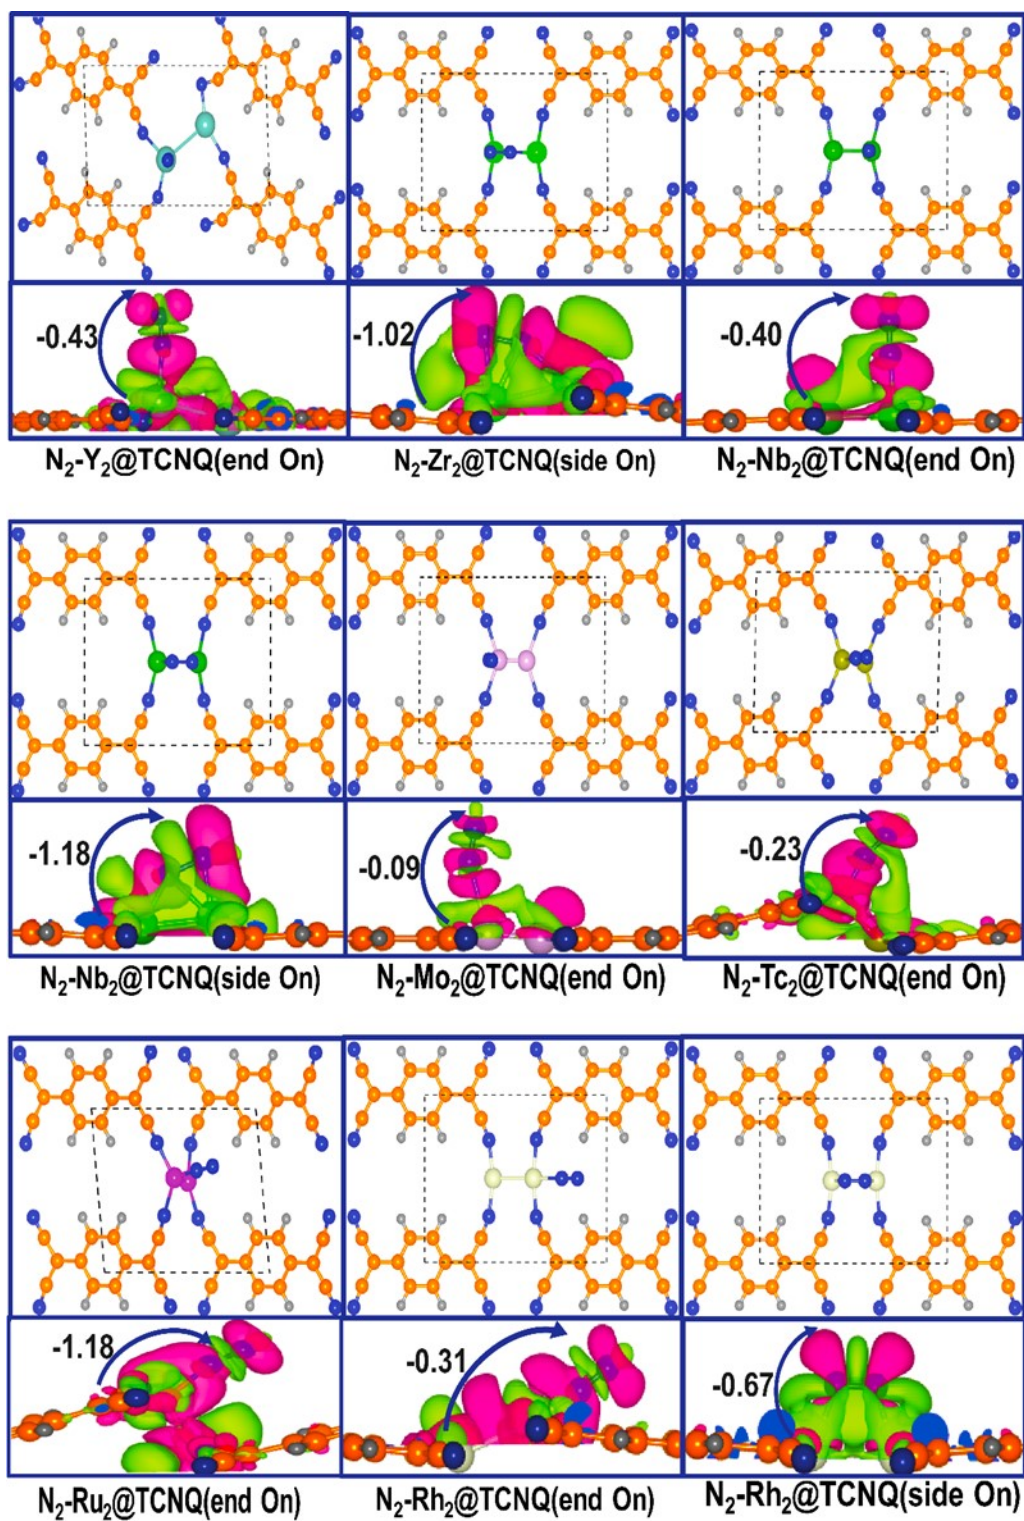

(b)

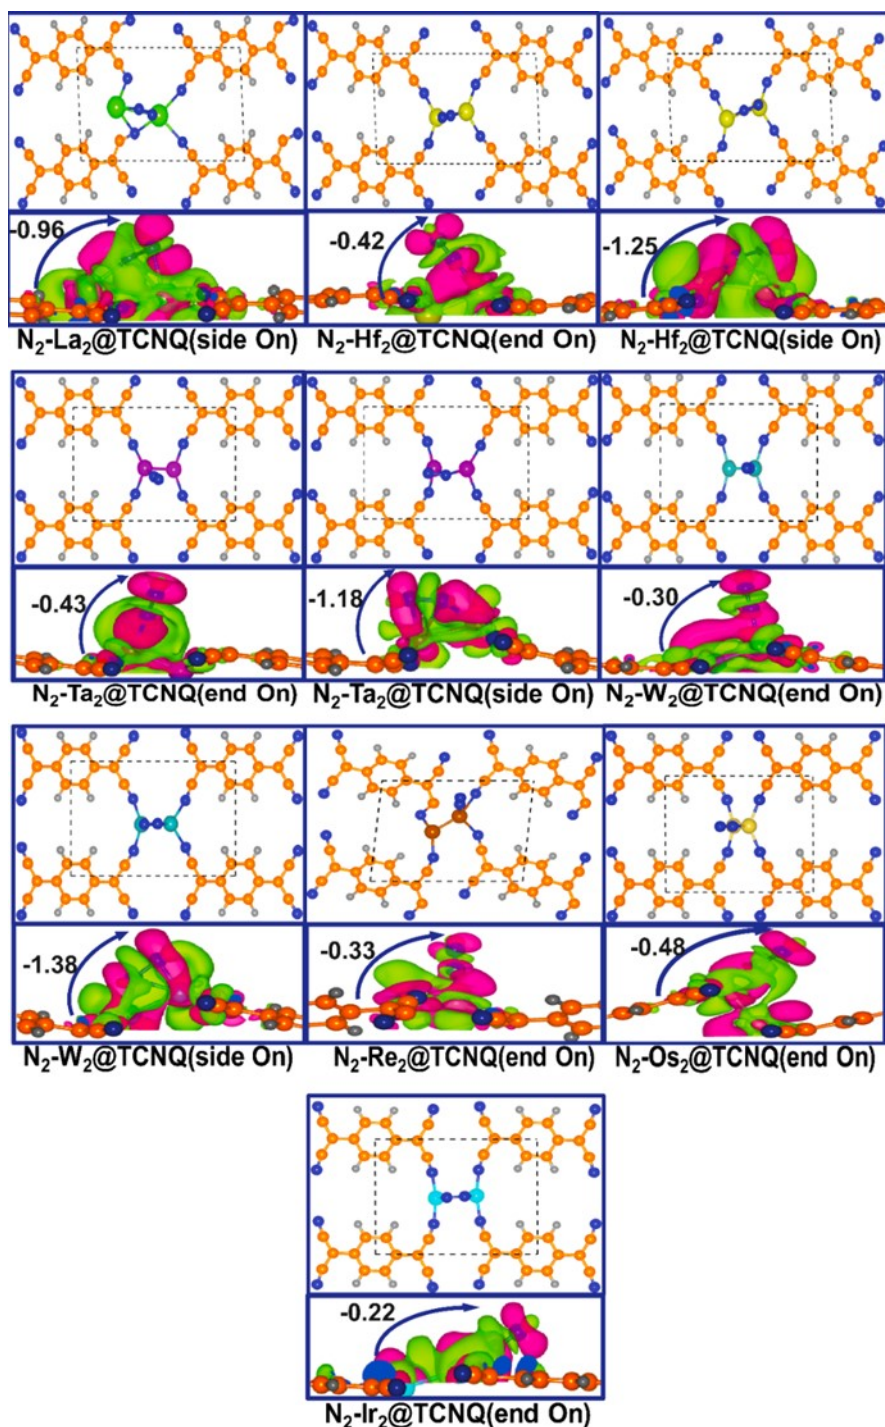

(c)

**Fig. S3.** Optimized structures (top view) and charge density differences plots of chemisorbed  $N_2$  on (a) 3d, (b) 4d, and (c) 5d DACs. The charge depletion and accumulation are depicted by pink and green colours, respectively. The isosurface value used for plotting the charge density

difference plots is  $0.0006 \text{ eA}^{-3}$ . The net Bader charge accumulated on the adsorbed  $\text{N}_2$  is depicted using blue arrow in the charge density difference plots.

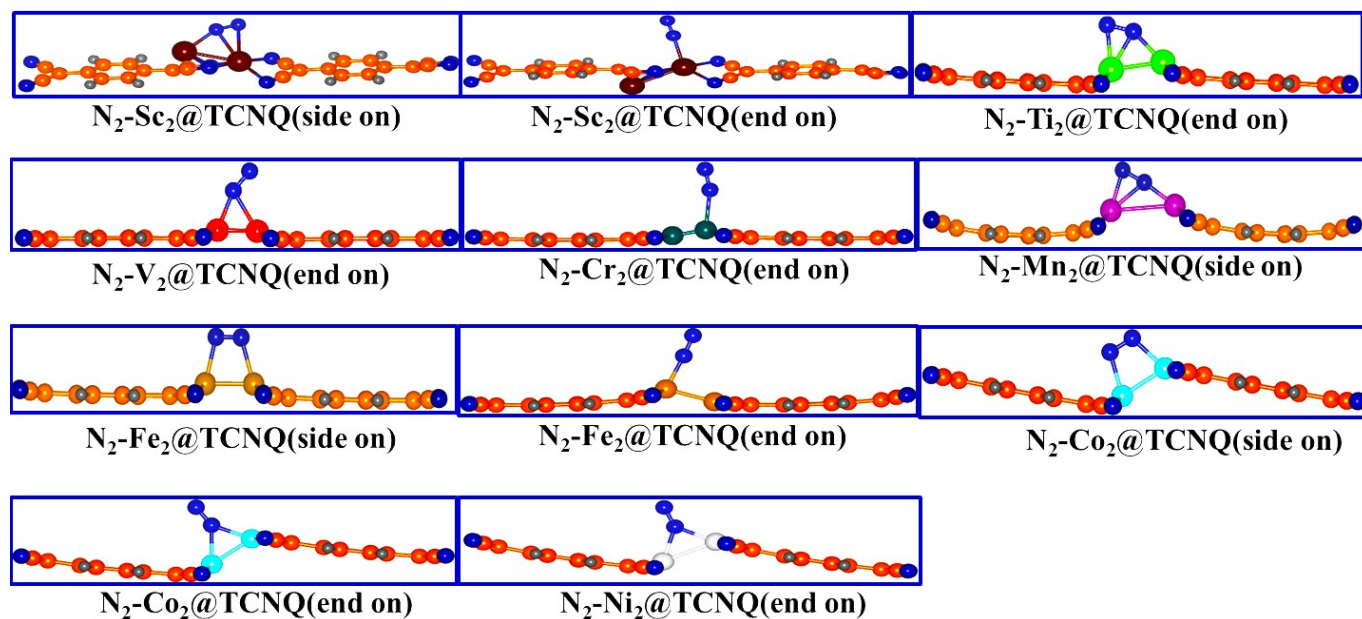

(a)

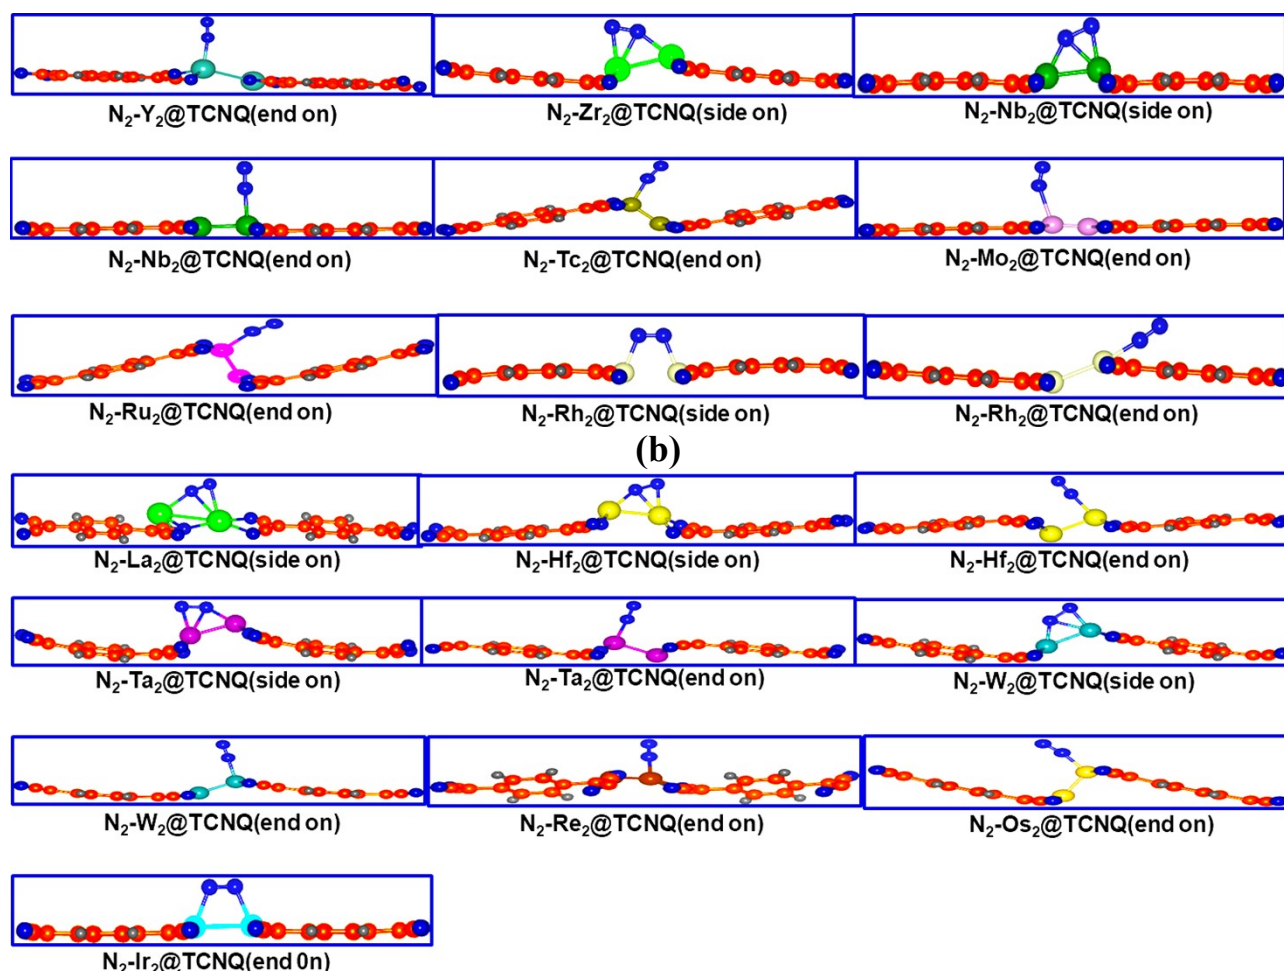

(b)

(c)

**Fig. S4.** Optimized side views of  $N_2$  adsorbed on the active site of (a) 3d, (b) 4d and (c) 5d transition metal-based DACs

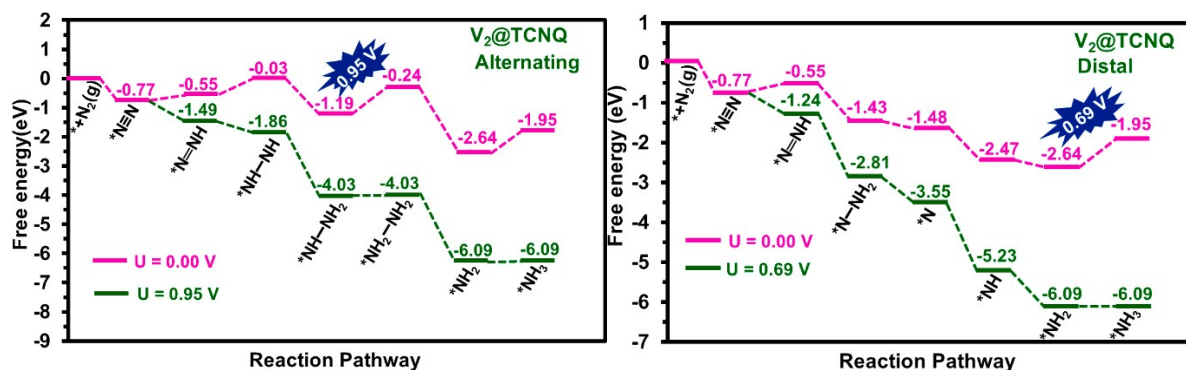

**Fig. S5.** Free energy profile for NRR on  $V_2$  DAC along alternating and distal mechanisms

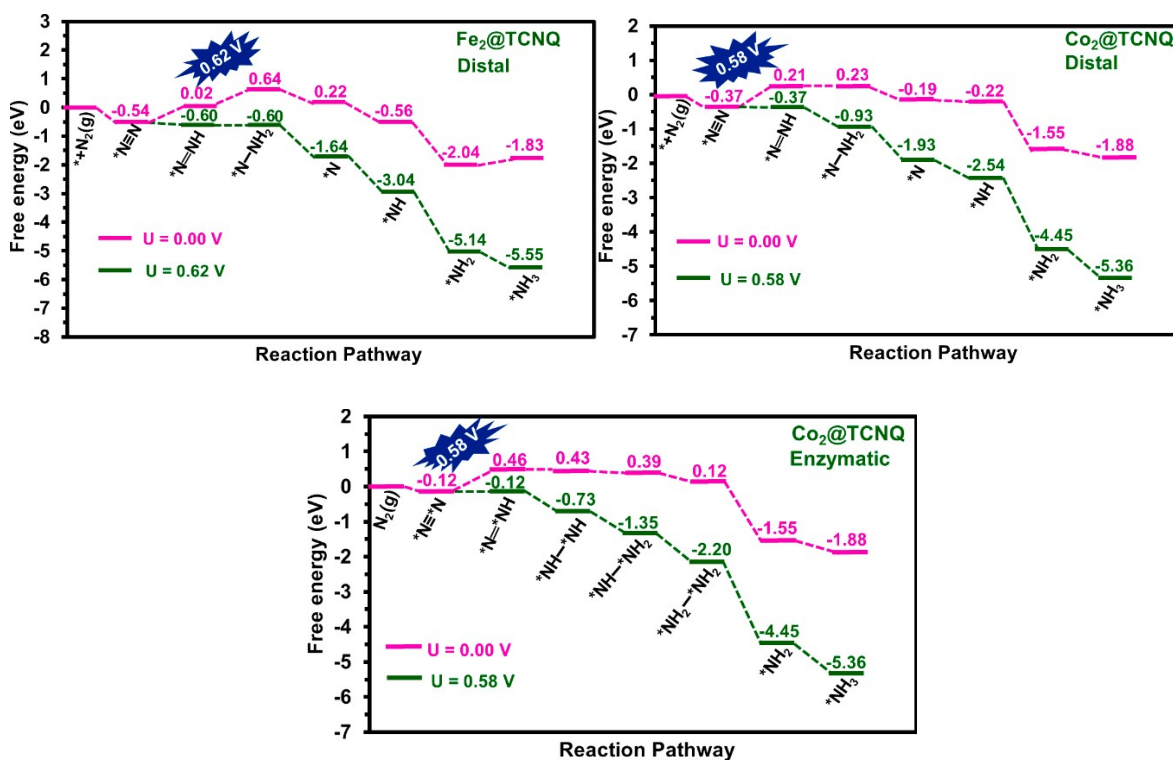

**Fig. S6.** Free energy profile for NRR on  $Fe_2$  DAC along distal mechanism and on  $Co_2$  DAC along distal and enzymatic mechanisms

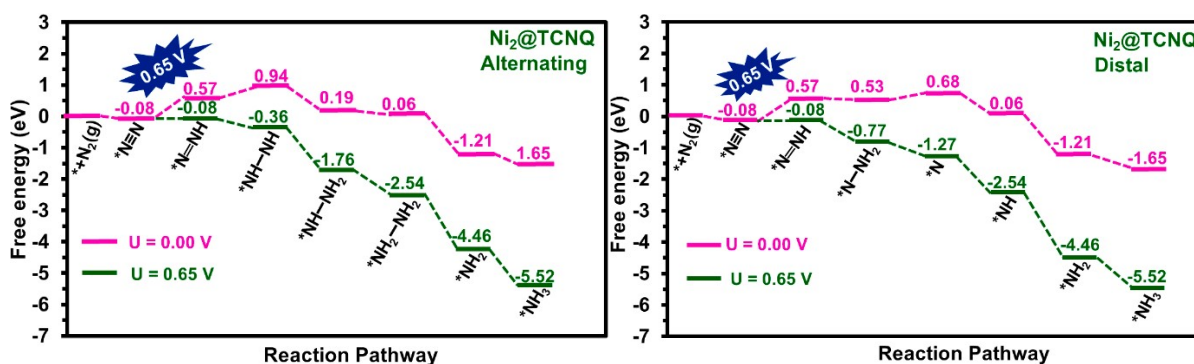

Fig. S7. Free energy profile for NRR on Ni<sub>2</sub> DAC along alternating and distal mechanisms

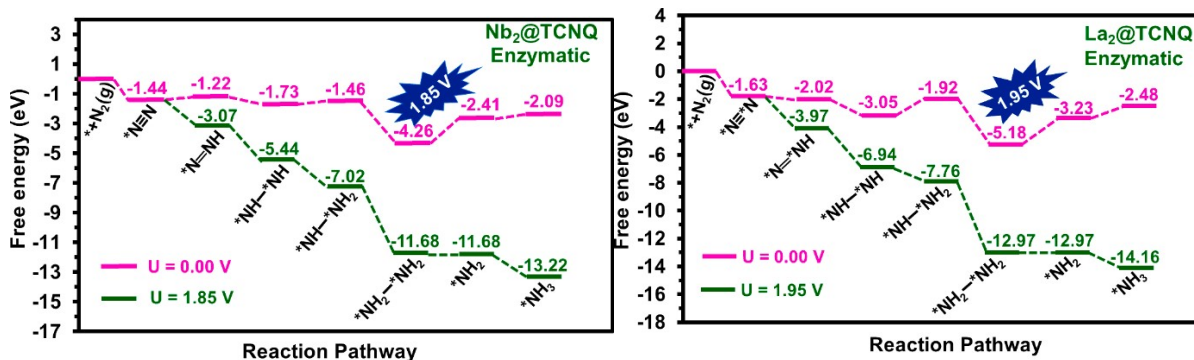

Fig. S8. Free energy profile for NRR on Nb<sub>2</sub> and La<sub>2</sub> DACs along enzymatic mechanism.

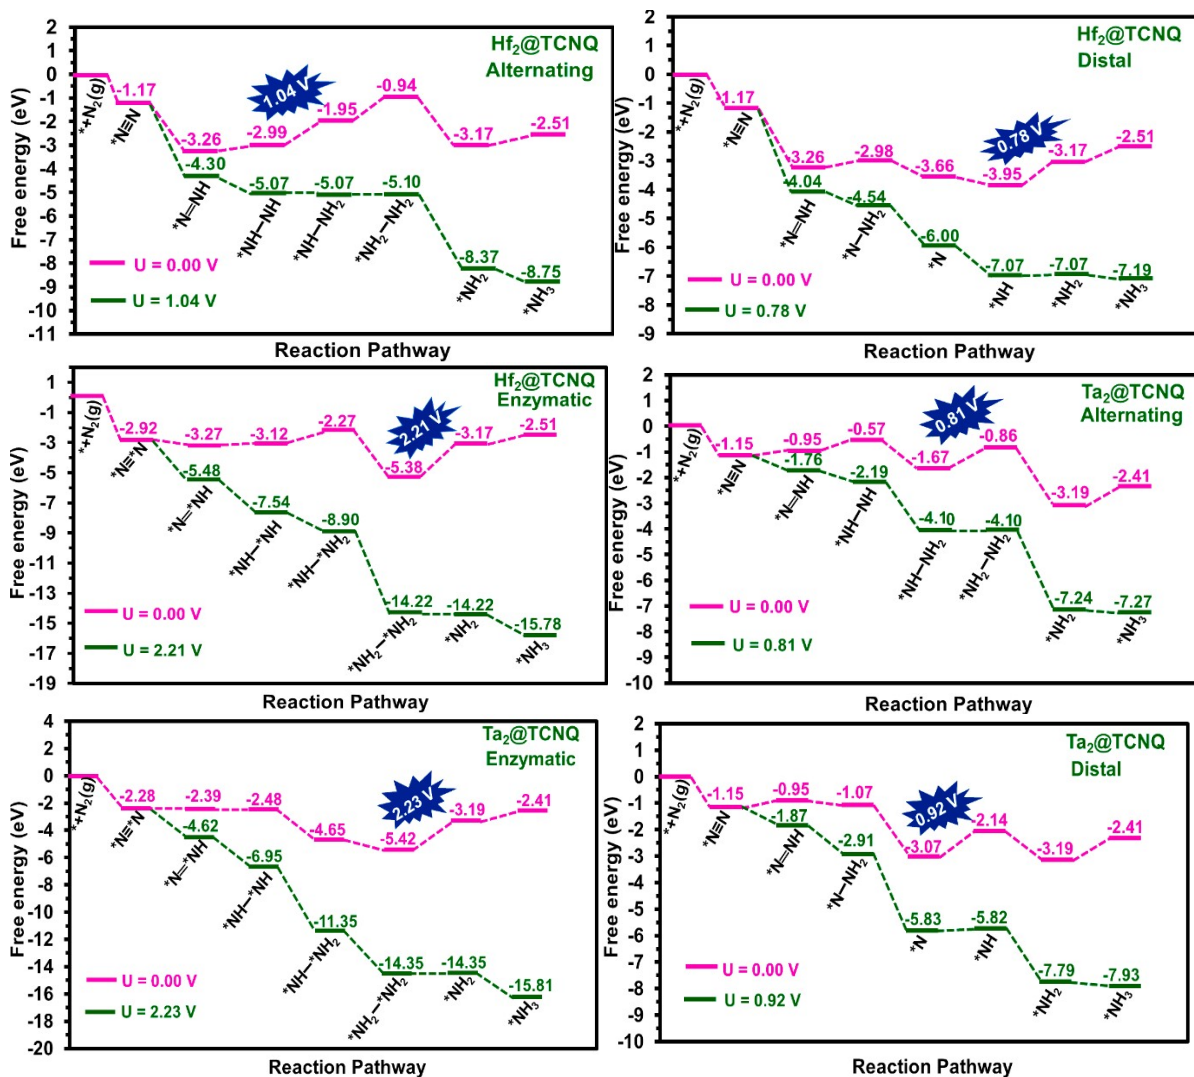

**Fig. S9.** Free energy profile for NRR on Hf<sub>2</sub> and Ta<sub>2</sub> DACs along alternating, distal and enzymatic mechanisms

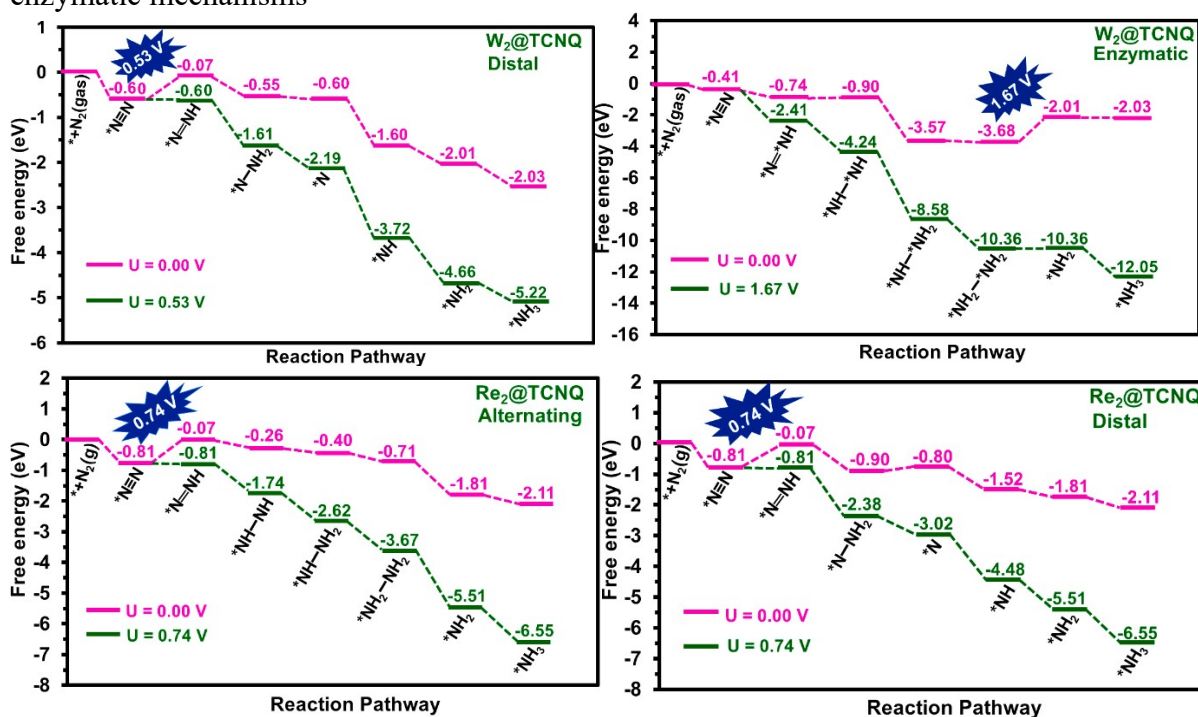

**Fig. S10.** Free energy profile for NRR on W<sub>2</sub> DAC along distal and enzymatic mechanisms and on Re<sub>2</sub> DAC along alternate and distal mechanisms

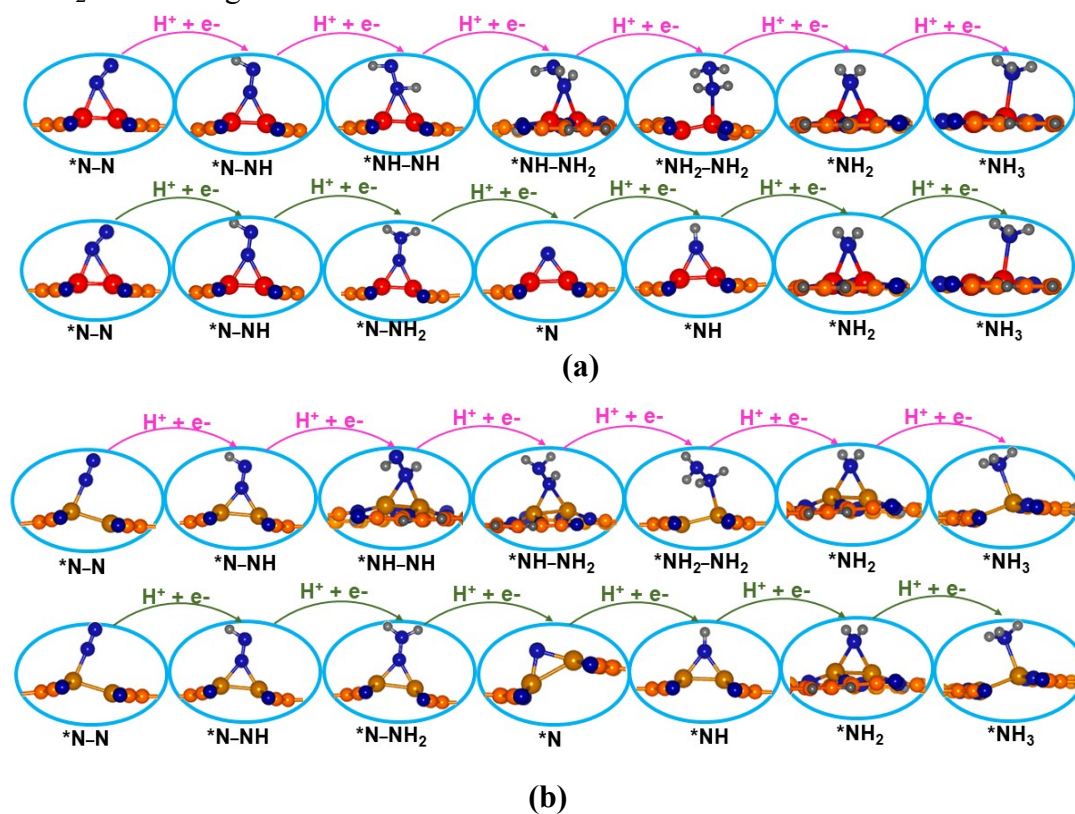



**Fig. S11.** Optimized truncated side views of NRR intermediates on (a)  $V_2$  and (b)  $Fe_2$  DACs along alternating and distal mechanisms. Pink and green coloured arrows indicate alternating and distal mechanisms respectively

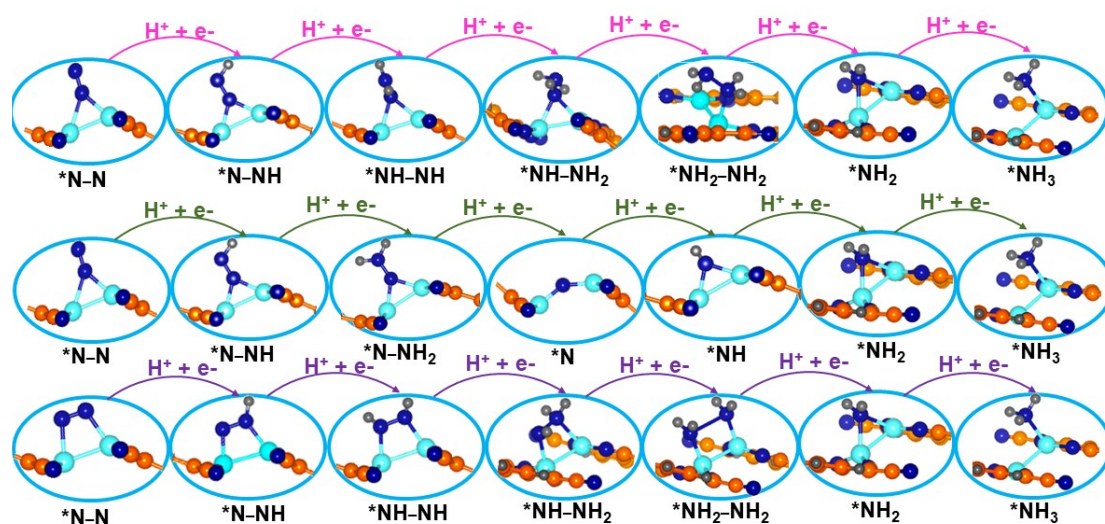

**Fig. S12.** Optimized truncated side views of NRR intermediates on  $Co_2$  DAC along alternating, distal, and enzymatic mechanisms. Pink, green, and purple-coloured arrows indicate alternating, distal, and enzymatic mechanisms respectively

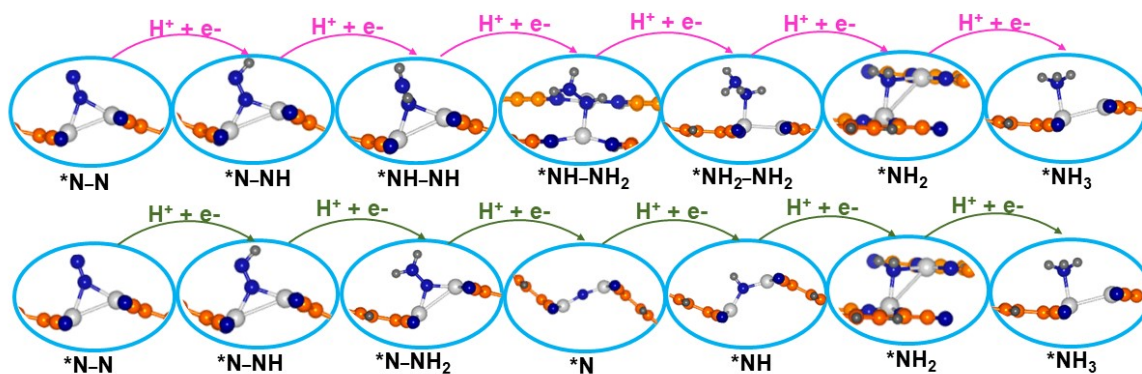

**Fig. S13.** Optimized truncated side views of NRR intermediates on  $Ni_2$  DAC along alternating and distal mechanisms. Pink and green coloured arrows indicate alternating and distal mechanisms respectively

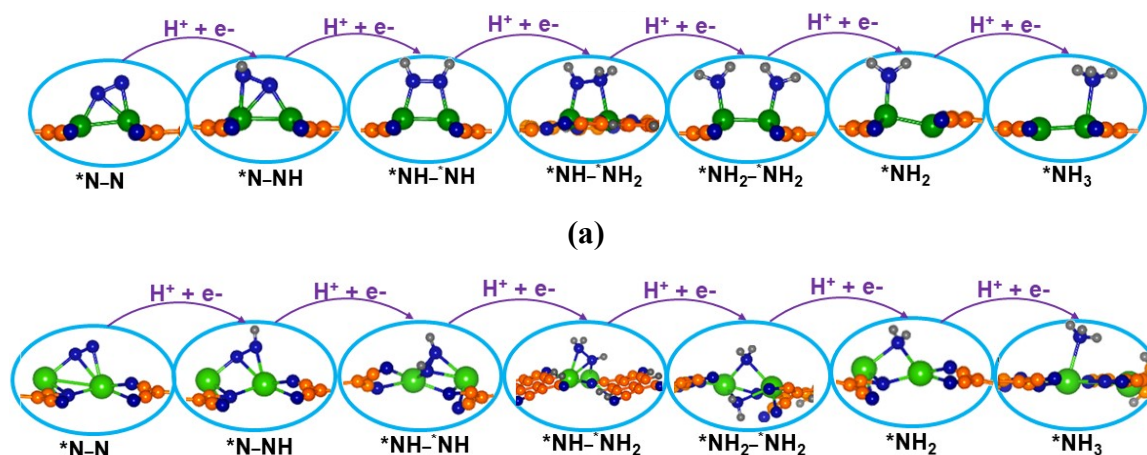

(b)

**Fig. S14.** Optimized truncated side views of NRR intermediates on (a) Nb<sub>2</sub> and (b) La<sub>2</sub> DACs along enzymatic mechanisms.

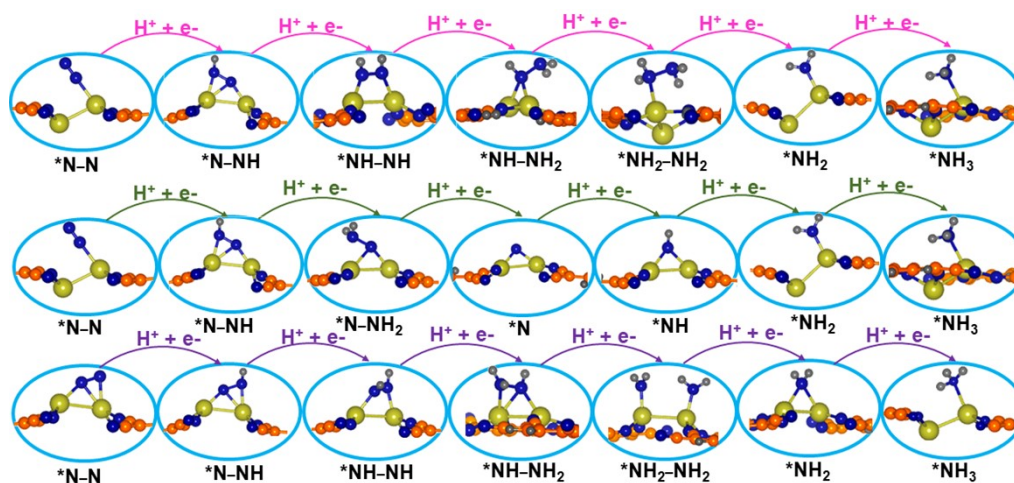

(a)

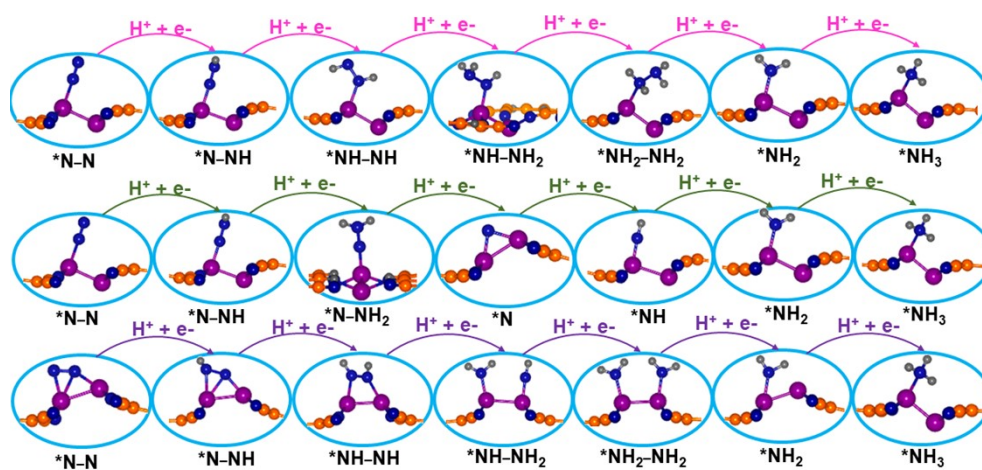

(b)

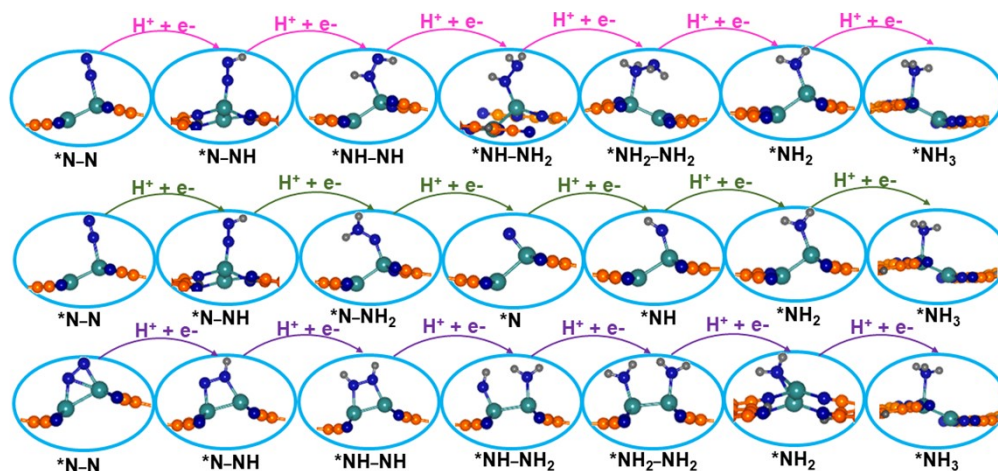

(c)

**Fig. S15.** Optimized truncated side views of NRR intermediates on (a) Hf<sub>2</sub> (b) Ta<sub>2</sub> and (c) W<sub>2</sub> DACs along alternating, distal, and enzymatic mechanisms. Pink, green, and purple-coloured arrows indicate alternating, distal, and enzymatic mechanisms respectively.

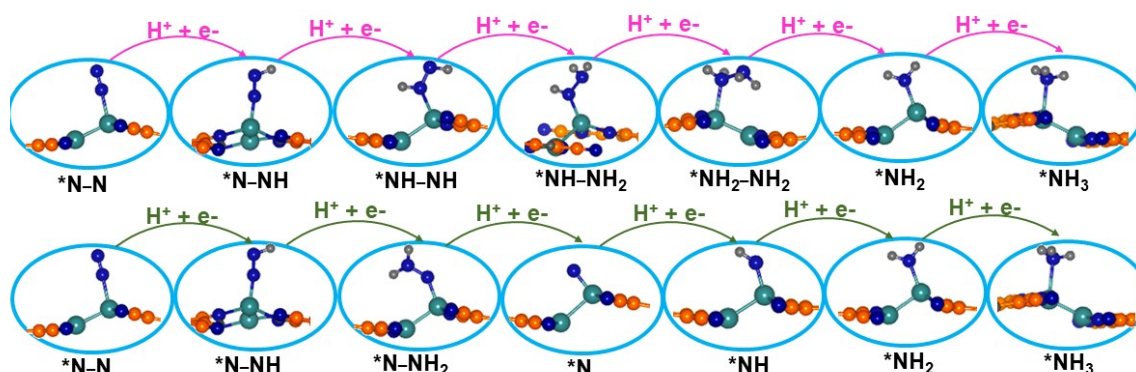

**Fig. S16.** Optimized truncated side views of NRR intermediates on Re<sub>2</sub> DAC along alternating and distal mechanisms. Pink and green coloured arrows indicate alternating and distal mechanisms respectively.

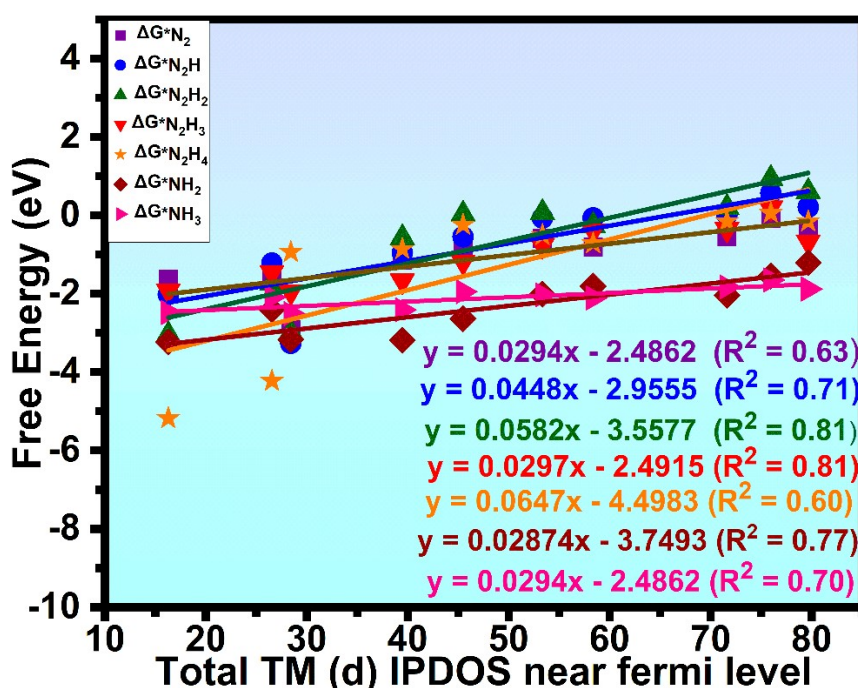

**Fig. 17.** Free energy changes for adsorption of the NRR intermediates (\*N<sub>2</sub>, \*N<sub>2</sub>H, \*N<sub>2</sub>H<sub>2</sub>, \*N<sub>2</sub>H<sub>3</sub>, \*N<sub>2</sub>H<sub>4</sub>, \*NH<sub>2</sub> and \*NH<sub>3</sub>) on the screened DACs: plotted as a function of total transition metal dimer d- states near Fermi level (-3.0 to 3.0 eV). The data points from left to right are for La<sub>2</sub>, Nb<sub>2</sub>, Hf<sub>2</sub>, Ta<sub>2</sub>, V<sub>2</sub>, W<sub>2</sub>, Re<sub>2</sub>, Fe<sub>2</sub>, Ni<sub>2</sub> and Co<sub>2</sub> catalysts respectively. Solid lines are the fitted linear relation between free energies and total d-states of the intermediates, with the slope and intercept shown in the plot.

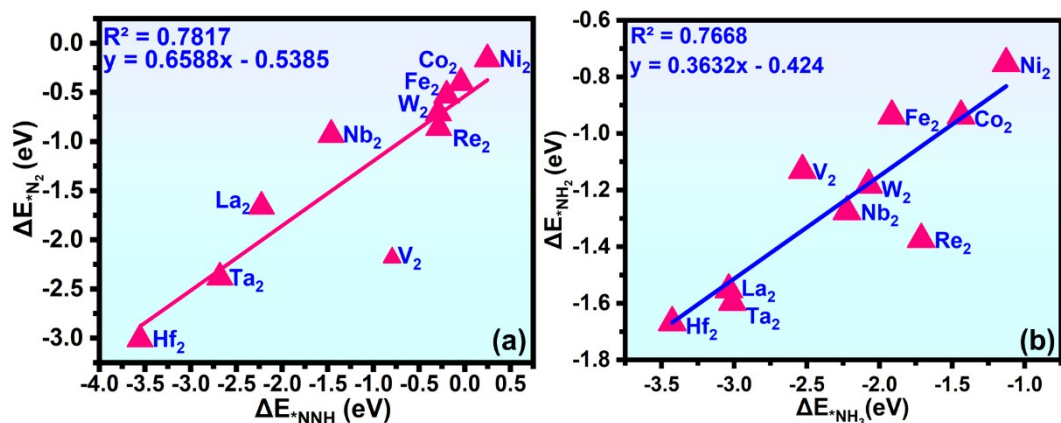

**Fig. 18.** The correlations between (a) adsorption energies of  $N_2$  ( $\Delta E^*_{N_2}$ ) and NNH ( $\Delta E^*_{NNH}$ ), (b) adsorption energies of  $NH_2$  ( $\Delta E^*_{NH_2}$ ) and  $NH_3$  ( $\Delta E^*_{NH_3}$ ) intermediates adsorbed on screened out DACs.

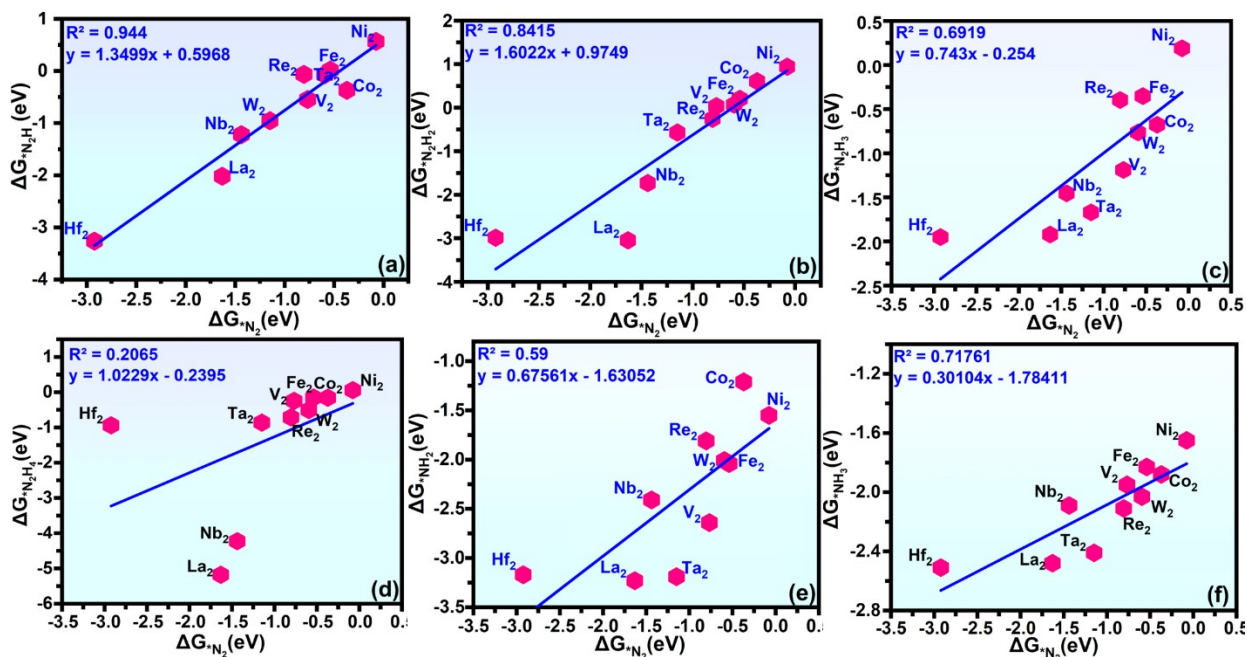

**Fig. S19.** The scaling relationships for free energy of (a)  $*N_2H$  vs  $*N_2$ , (b)  $*N_2H_2$  vs  $*N_2$ , (c)  $*N_2H_3$  vs  $*N_2$ , (d)  $*N_2H_4$  vs  $*N_2$ , (e)  $*NH_2$  vs  $*N_2$ , and (f)  $*NH_3$  vs  $*N_2$  (NRR intermediates on the screened DACs).

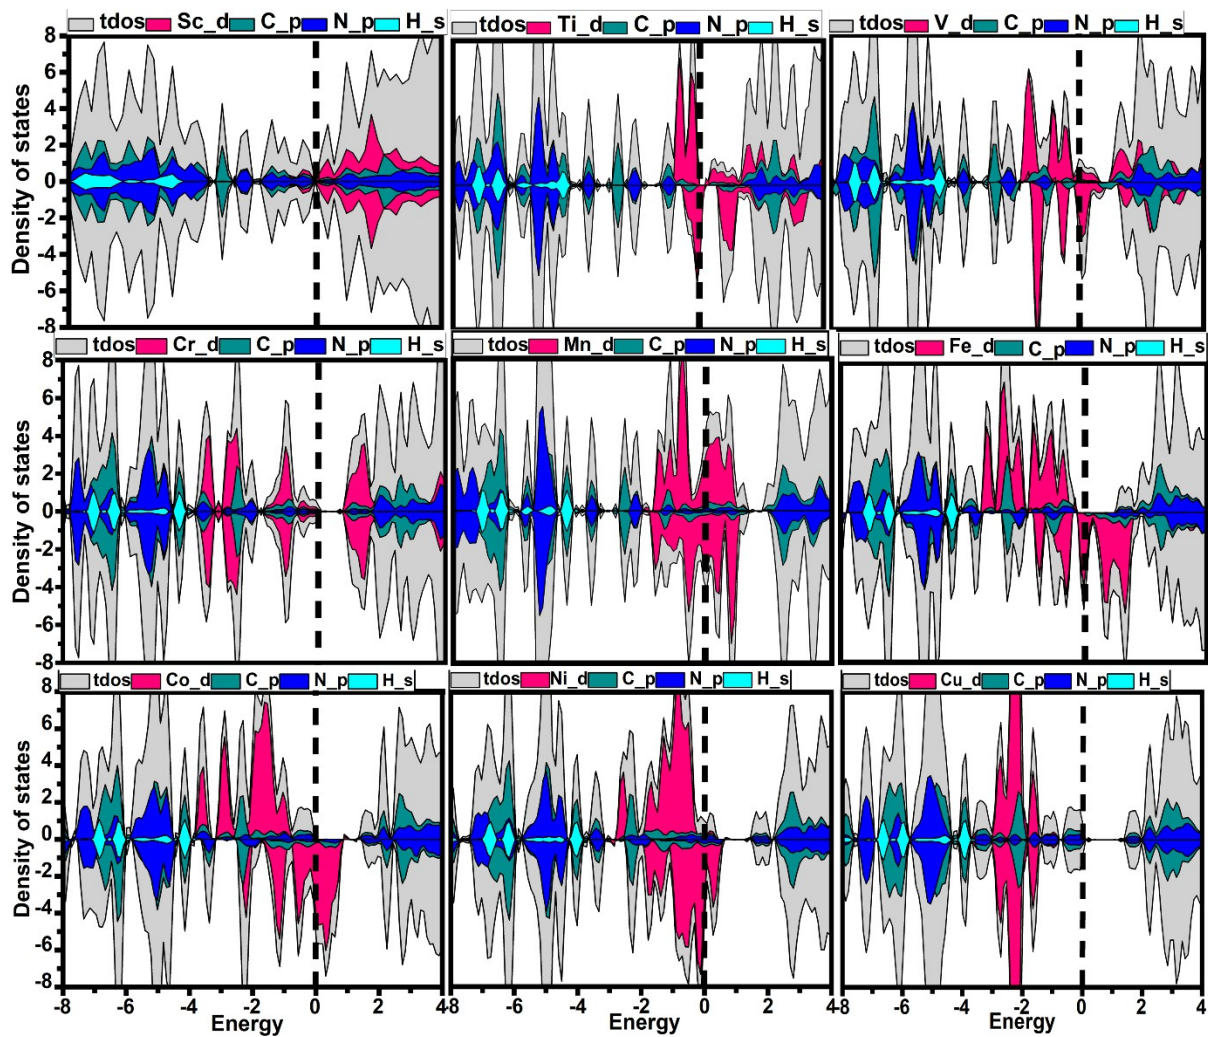

(i)

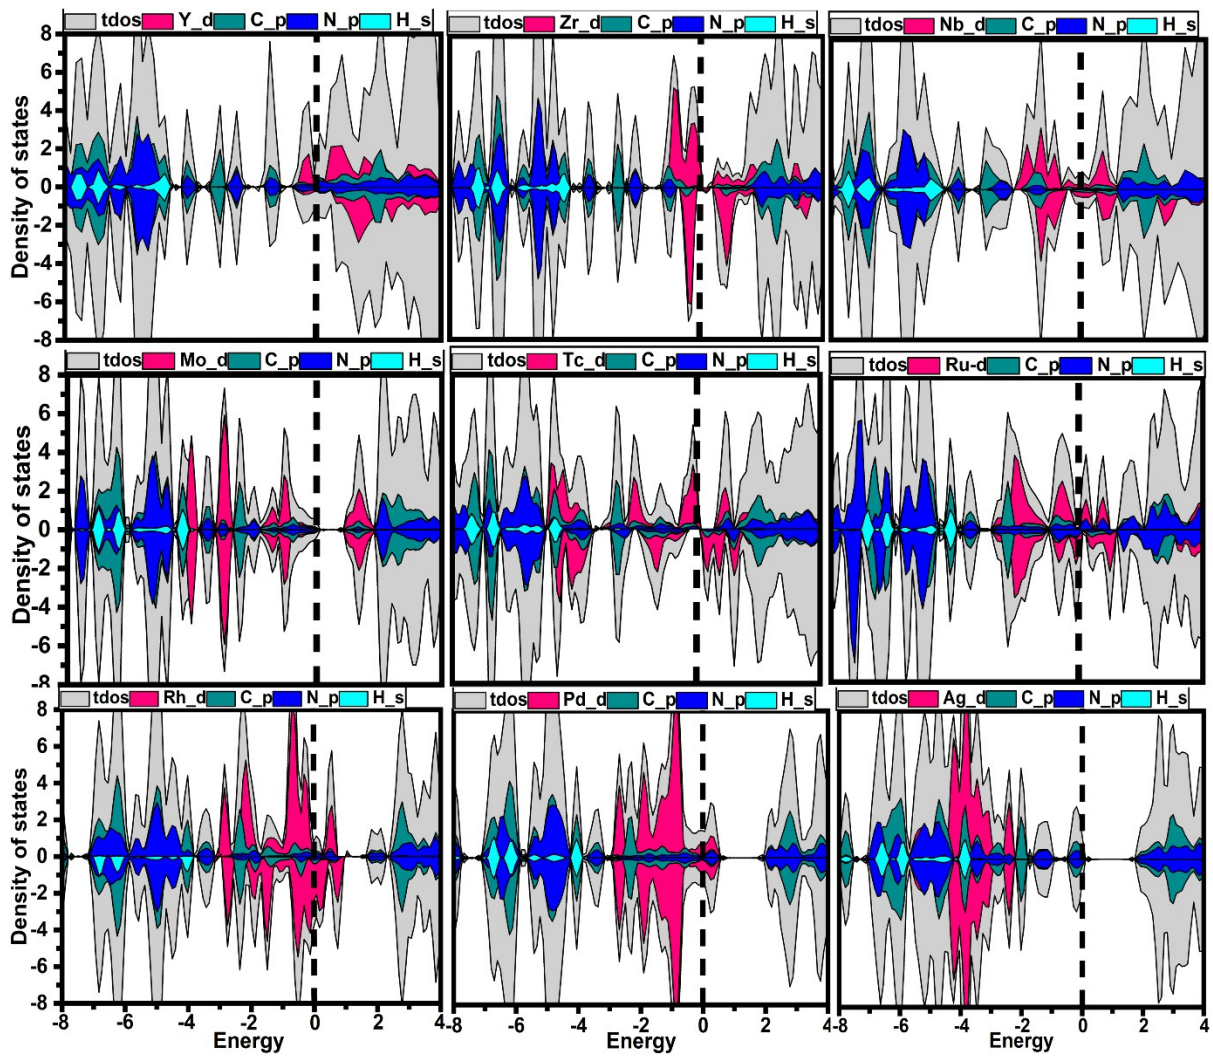

(ii)

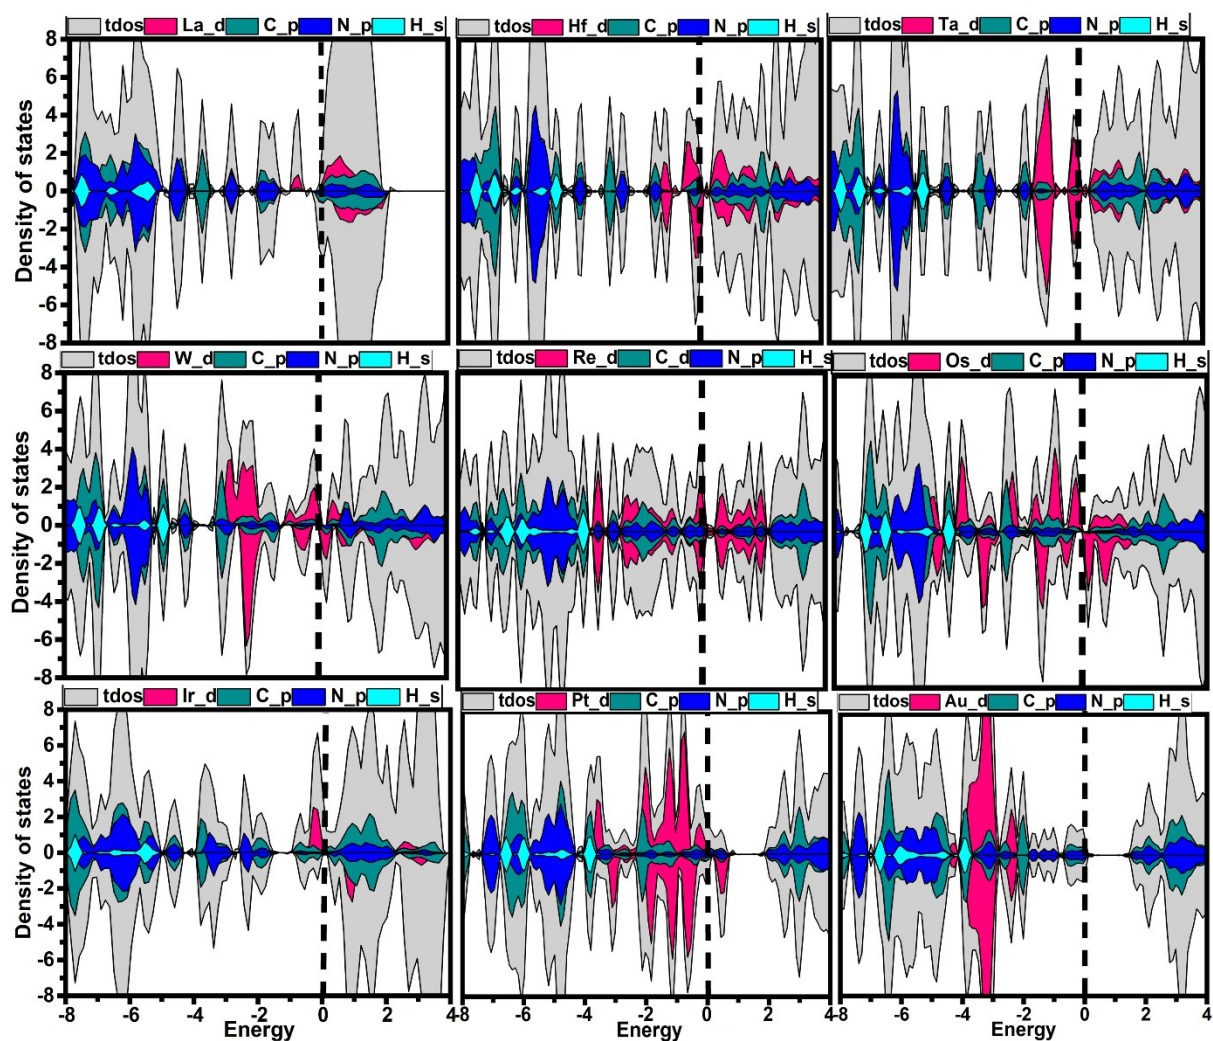

(iii)

**Fig. S20.** The projected density of states (PDOS) of (i) 3d, (ii) 4d, and (iii) 5d transition metal based DACs. The PDOS of the total, TM-d, N-2p, C-2p and H-1s is plotted in grey, pink, dark green, blue and cyan colours, respectively.

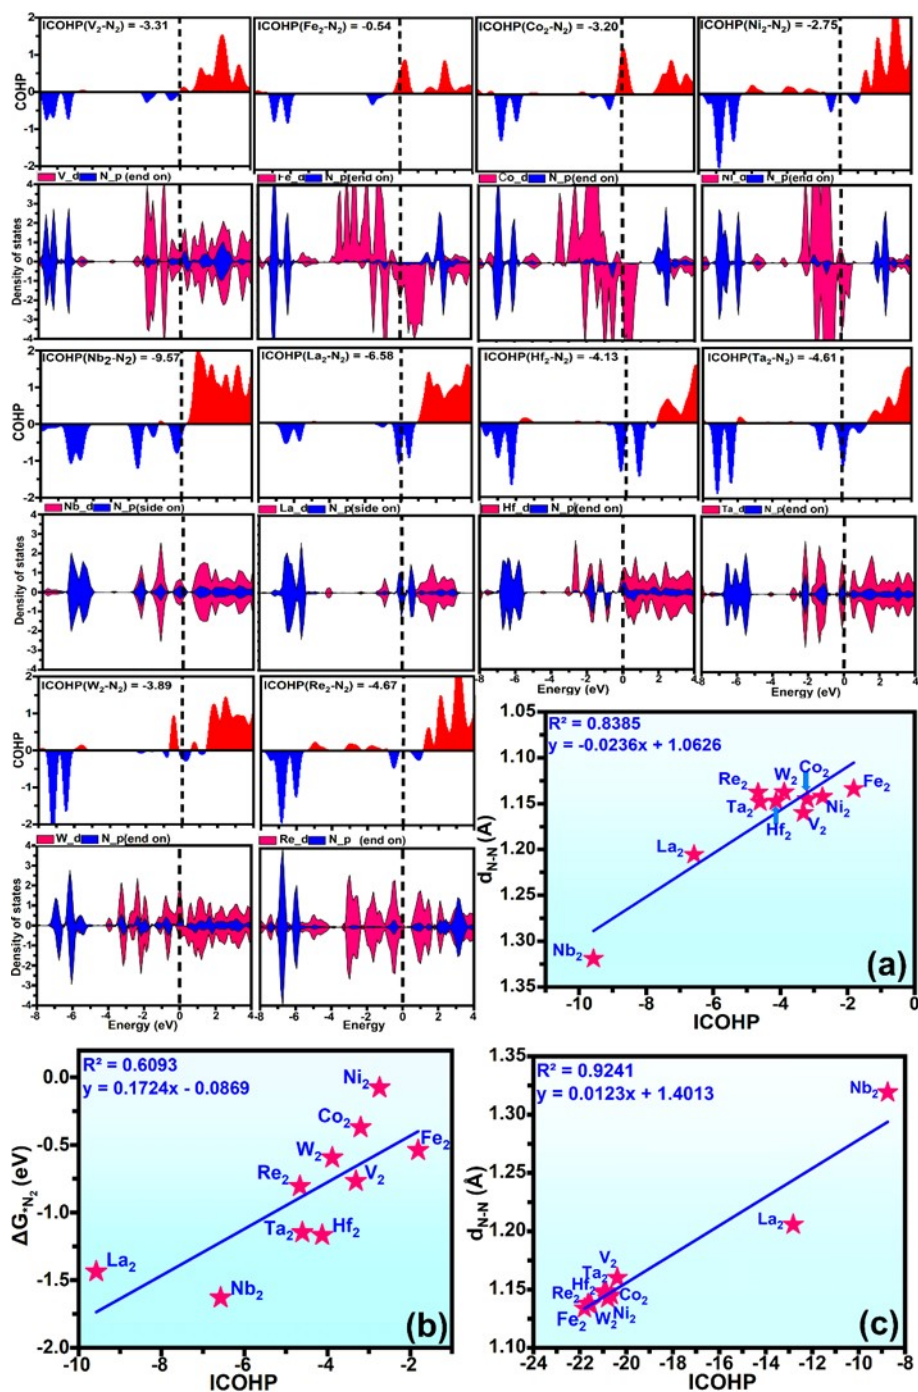

**Fig. 21.** Computed crystal orbital Hamilton populations (COHPs) and respective orbital projected density of states (oPDOS) for the direct interaction between  $M_2-N$  bonds of the  $N_2$  adsorbed on the screened DACs. The bonding and antibonding states in COHP are depicted by blue and red, respectively. Plots representing the correlation between (a) the calculated integrated crystal Hamilton population (ICOHP) of the bond between screened DACs and N atom/atoms of adsorbed  $*N_2$  molecule and N-N bond length. (b) the calculated ICOHP of the bond between screened DACs and N atom/atoms of adsorbed  $*N_2$  molecule and free energy change for  $*N_2$  adsorption ( $\Delta G_{*N_2}$ ) (c) the calculated ICOHP of N-N bond on screened DACs and N-N bond length



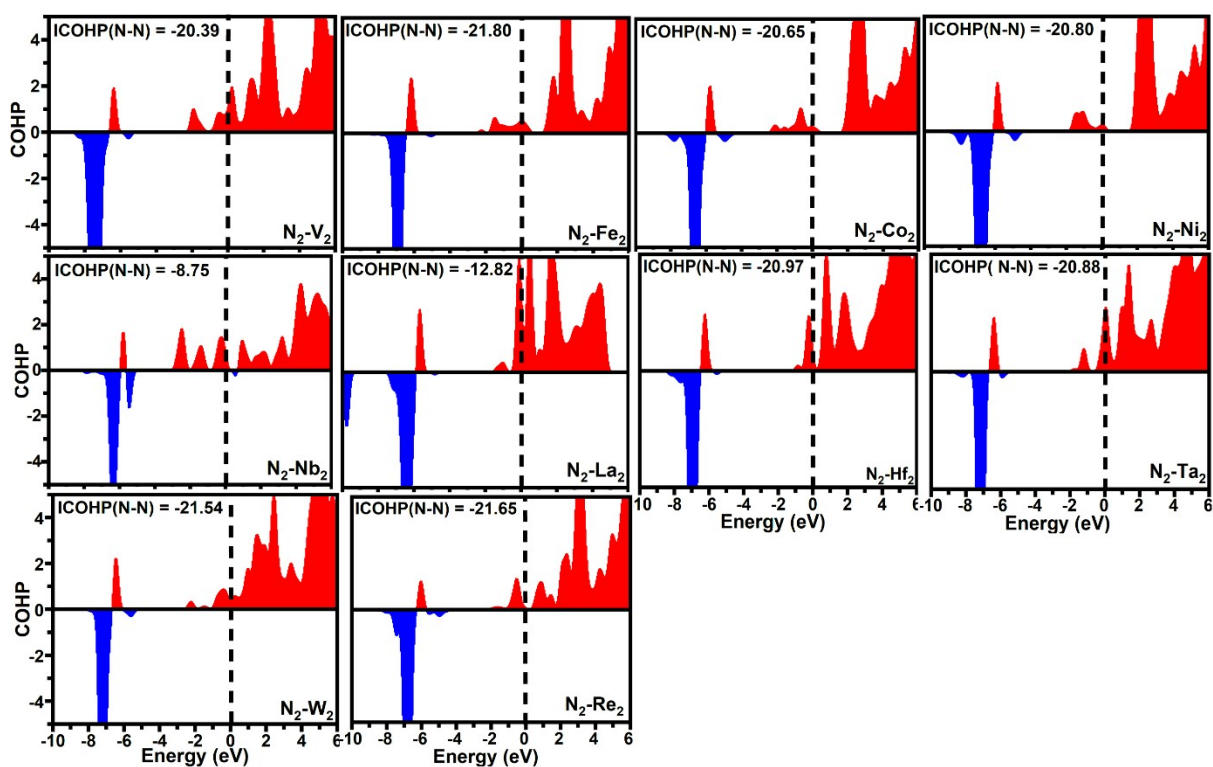

**Fig. S22.** The crystal orbital Hamilton population (COHP) of N–N bond of N<sub>2</sub> on the screened DACs. The bonding and antibonding states in COHP are depicted by blue and red, respectively.

**Table S2.** Energy, ZPE, TS, G and  $\Delta G$  of reaction steps of NRR on V<sub>2</sub>, Fe<sub>2</sub> and Ni<sub>2</sub> DACs along alternating and distal mechanisms

**Alternating NRR mechanism on V<sub>2</sub>**

| System  | Energy  | ZPE  | TS   | G       | $\Delta G$ |
|---------|---------|------|------|---------|------------|
| N2P1    | -187.98 | 0.20 | 0.16 | -187.94 | -0.77      |
| N2P1-1H | -191.38 | 0.50 | 0.14 | -191.02 | -0.55      |
| N2P1-2H | -194.35 | 0.79 | 0.18 | -193.74 | 0.03       |
| N2P1-3H | -199.19 | 1.05 | 0.12 | -198.26 | -1.19      |
| N2P1-4H | -201.87 | 1.48 | 0.24 | -200.62 | -0.25      |
| N1P1-2H | -188.18 | 0.71 | 0.08 | -187.55 | -2.64      |

|                |         |      |      |         |       |
|----------------|---------|------|------|---------|-------|
| <b>N1P1-3H</b> | -191.04 | 1.01 | 0.13 | -190.17 | -1.95 |
|----------------|---------|------|------|---------|-------|

### Distal NRR mechanism on V<sub>2</sub>

| <b>System</b>  | <b>Energy</b> | <b>ZPE</b> | <b>TS</b> | <b>G</b> | <b>ΔG</b> |
|----------------|---------------|------------|-----------|----------|-----------|
| <b>N2P1</b>    | -187.98       | 0.20       | 0.16      | -187.94  | -0.77     |
| <b>N2P1-1H</b> | -191.38       | 0.50       | 0.14      | -191.02  | -0.55     |
| <b>N2P1-2H</b> | -195.87       | 0.83       | 0.15      | -195.20  | -1.43     |
| <b>N1P1</b>    | -179.84       | 0.09       | 0.04      | -179.79  | -1.48     |
| <b>N1P1-1H</b> | -184.40       | 0.37       | 0.06      | -184.09  | -2.47     |
| <b>N1P1-2H</b> | -188.18       | 0.71       | 0.08      | -187.55  | -2.64     |
| <b>N1P1-3H</b> | -191.04       | 1.01       | 0.13      | -190.17  | -1.95     |

### Alternating NRR mechanism on Fe<sub>2</sub>

| <b>System</b>  | <b>Energy</b> | <b>ZPE</b> | <b>TS</b> | <b>G</b> | <b>ΔG</b> |
|----------------|---------------|------------|-----------|----------|-----------|
| <b>N2P1</b>    | -185.60       | 0.19       | 0.18      | -185.59  | -0.54     |
| <b>N2P1-1H</b> | -188.65       | 0.48       | 0.16      | -188.33  | 0.02      |
| <b>N2P1-2H</b> | -192.09       | 0.81       | 0.17      | -191.44  | 0.20      |
| <b>N2P1-3H</b> | -196.24       | 1.13       | 0.19      | -195.30  | -0.35     |
| <b>N2P1-4H</b> | -199.64       | 1.48       | 0.24      | -198.40  | -0.15     |
| <b>N1P1-2H</b> | -185.44       | 0.70       | 0.09      | -184.83  | -2.04     |
| <b>N1P1-3H</b> | -188.72       | 1.01       | 0.20      | -187.92  | -1.83     |

### Distal NRR mechanism on Fe<sub>2</sub>

| <b>System</b>  | <b>Energy</b> | <b>ZPE</b> | <b>TS</b> | <b>G</b> | <b>ΔG</b> |
|----------------|---------------|------------|-----------|----------|-----------|
| <b>N2P1</b>    | -185.60       | 0.19       | 0.18      | -185.59  | -0.54     |
| <b>N2P1-1H</b> | -188.65       | 0.48       | 0.16      | -188.33  | 0.02      |
| <b>N2P1-2H</b> | -192.30       | 1.57       | 0.27      | -191.01  | 0.64      |
| <b>N1P1</b>    | -176.00       | 0.08       | 0.05      | -175.97  | 0.22      |
| <b>N1P1-1H</b> | -180.31       | 0.33       | 0.07      | -180.05  | -0.56     |
| <b>N1P1-2H</b> | -185.44       | 0.70       | 0.09      | -184.83  | -2.04     |
| <b>N1P1-3H</b> | -188.72       | 1.01       | 0.20      | -187.92  | -1.83     |

### Alternating NRR mechanism on Ni<sub>2</sub>

| <b>System</b>  | <b>Energy</b> | <b>ZPE</b> | <b>TS</b> | <b>G</b> | <b>ΔG</b> |
|----------------|---------------|------------|-----------|----------|-----------|
| <b>N2P1</b>    | -180.29       | 0.22       | 0.12      | -180.19  | -0.08     |
| <b>N2P1-1H</b> | -183.27       | 0.50       | 0.07      | -182.84  | 0.57      |
| <b>N2P1-2H</b> | -186.43       | 0.81       | 0.15      | -185.77  | 0.94      |
| <b>N2P1-3H</b> | -190.82       | 1.16       | 0.16      | -189.82  | 0.19      |
| <b>N2P1-4H</b> | -194.46       | 1.47       | 0.27      | -193.26  | 0.06      |
| <b>N1P1-2H</b> | -179.72       | 0.71       | 0.07      | -179.07  | -1.21     |
| <b>N1P1-3H</b> | -183.60       | 1.01       | 0.19      | -182.77  | -1.65     |

**Distal NRR mechanism on Ni<sub>2</sub>**

| System  | Energy  | ZPE  | TS        | G       | ΔG    |
|---------|---------|------|-----------|---------|-------|
| N2P1    | -180.29 | 0.22 | 0.12      | -180.19 | -0.08 |
| N2P1-1H | -183.27 | 0.50 | 0.07      | -182.84 | 0.57  |
| N2P1-2H | -186.84 | 0.80 | .15026760 | -186.19 | 0.53  |
| N1P1    | -170.62 | 0.09 | 0.05      | -170.58 | 0.67  |
| N1P1-1H | -174.81 | 0.37 | 0.06      | -174.50 | 0.06  |
| N1P1-2H | -179.72 | 0.71 | 0.07      | -179.07 | -1.21 |
| N1P1-3H | -183.60 | 1.01 | 0.19      | -182.77 | -1.65 |

**Table S3.** Energy, ZPE, TS, G and ΔG of reaction steps of NRR on Co<sub>2</sub> DAC along alternating, distal and enzymatic mechanisms

**Alternating NRR mechanism on Co<sub>2</sub>**

| System  | Energy  | ZPE  | TS   | G       | ΔG    |
|---------|---------|------|------|---------|-------|
| N2P1    | -182.87 | 0.20 | 0.14 | -182.81 | -0.37 |
| N2P1-1H | -185.89 | 0.50 | 0.14 | -185.53 | 0.21  |
| N2P1-2H | -189.09 | 0.82 | 0.16 | -188.44 | 0.61  |
| N2P1-3H | -193.38 | 0.50 | 0.14 | -193.02 | -0.68 |
| N2P1-4H | -197.04 | 1.49 | 0.24 | -195.80 | -0.16 |
| N1P1-2H | -182.36 | 0.71 | 0.08 | -181.73 | -1.55 |
| N1P1-3H | -186.19 | 1.01 | 0.19 | -185.37 | -1.88 |

**Distal NRR mechanism on Co<sub>2</sub>**

| System  | Energy  | ZPE  | TS   | G       | ΔG    |
|---------|---------|------|------|---------|-------|
| N2P1    | -182.87 | 0.20 | 0.14 | -182.81 | -0.37 |
| N2P1-1H | -185.89 | 0.50 | 0.14 | -185.53 | 0.21  |
| N2P1-2H | -189.45 | 0.81 | 0.17 | -188.81 | 0.23  |
| N1P1    | -173.88 | 0.10 | 0.00 | -173.78 | -0.19 |
| N1P1-1H | -177.41 | 0.36 | 0.06 | -177.11 | -0.22 |
| N1P1-2H | -182.36 | 0.71 | 0.08 | -181.73 | -1.54 |
| N1P1-3H | -186.19 | 1.01 | 0.19 | -185.37 | -1.87 |

**Enzymatic NRR mechanism on Co<sub>2</sub>**

| System  | Energy  | ZPE  | TS   | G       | ΔG    |
|---------|---------|------|------|---------|-------|
| N2P3    | -182.65 | 0.20 | 0.12 | -182.56 | -0.12 |
| N2P3-1H | -185.67 | 0.50 | 0.11 | -185.28 | 0.46  |
| N2P3-2H | -189.30 | 0.82 | 0.13 | -188.61 | 0.43  |
| N2P3-3H | -193.07 | 1.20 | 0.08 | -191.95 | 0.39  |
| N2P3-4H | -196.87 | 1.45 | .010 | -195.52 | 0.12  |
| N1P1-2H | -182.36 | 0.71 | 0.08 | -181.73 | -1.54 |
| N1P1-3H | -186.19 | 1.01 | 0.19 | -185.37 | -1.87 |

**Table S4.** Energy, ZPE, TS, G and  $\Delta G$  of reaction steps of NRR on Nb<sub>2</sub> and La<sub>2</sub> DACs along enzymatic mechanisms

**Enzymatic NRR mechanism on Nb<sub>2</sub>**

| System  | Energy  | ZPE  | TS   | G       | $\Delta G$ |
|---------|---------|------|------|---------|------------|
| N2P3    | -189.67 | 0.20 | 0.08 | -189.55 | -1.44      |
| N2P3-1H | -192.98 | 0.48 | 0.13 | -192.63 | -1.22      |
| N2P3-2H | -197.12 | 0.81 | 0.13 | -196.44 | -1.73      |
| N2P3-3H | -200.46 | 1.15 | 0.15 | -199.47 | -1.46      |
| N2P3-4H | -206.65 | 1.34 | 0.22 | -205.54 | -4.23      |
| N1P1-2H | -188.81 | 0.67 | 0.12 | -188.26 | -2.41      |
| N1P1-3H | -192.12 | 1.01 | 0.13 | -191.25 | -2.09      |

**Enzymatic NRR mechanism on La<sub>2</sub>**

| System  | Energy  | ZPE  | TS   | G       | $\Delta G$ |
|---------|---------|------|------|---------|------------|
| N2P3    | -184.63 | 0.18 | 0.13 | -184.58 | -1.63      |
| N2P3-1H | -188.58 | 0.46 | 0.14 | -188.27 | -2.02      |
| N2P3-2H | -193.25 | 0.78 | 0.13 | -192.59 | -3.05      |
| N2P3-3H | -195.69 | 1.12 | 0.20 | -194.77 | -1.92      |
| N2P3-4H | -202.43 | 1.32 | 0.22 | -201.33 | -5.18      |
| N1P1-2H | -184.46 | 0.65 | 0.11 | -183.93 | -3.23      |
| N1P1-3H | -187.24 | 0.98 | 0.21 | -186.47 | -2.48      |

**Table S5.** Energy, ZPE, TS, G and  $\Delta G$  of reaction steps of NRR on Hf<sub>2</sub>, Ta<sub>2</sub> and W<sub>2</sub> DACs along alternating, distal and enzymatic mechanisms

**Alternating NRR mechanism on Hf<sub>2</sub>**

| System  | Energy  | ZPE  | TS   | G       | $\Delta G$ |
|---------|---------|------|------|---------|------------|
| N2P1    | -189.16 | 0.38 | 0.21 | -188.99 | -1.17      |
| N2P1-1H | -194.78 | 0.48 | 0.08 | -194.38 | -3.26      |
| N2P1-2H | -198.06 | 0.80 | 0.14 | -197.40 | -2.99      |
| N2P1-3H | -200.61 | 1.13 | 0.19 | -199.67 | -1.95      |
| N2P1-4H | -203.23 | 1.49 | 0.22 | -201.96 | -0.94      |
| N1P1-2H | -189.23 | 0.64 | 0.14 | -188.73 | -3.17      |
| N1P1-3H | -192.22 | 1.01 | 0.16 | -191.38 | -2.51      |

**Distal NRR mechanism on Hf<sub>2</sub>**

| System  | Energy  | ZPE  | TS   | G       | $\Delta G$ |
|---------|---------|------|------|---------|------------|
| N2P1    | -189.16 | 0.38 | 0.21 | -188.99 | -1.17      |
| N2P1-1H | -194.78 | 0.48 | 0.08 | -194.38 | -3.26      |
| N2P1-2H | -198.15 | 0.87 | 0.12 | -197.40 | -2.98      |
| N1P1    | -182.66 | 0.09 | 0.05 | -182.63 | -3.66      |

|                |         |      |      |         |       |
|----------------|---------|------|------|---------|-------|
| <b>N1P1-1H</b> | -186.52 | 0.35 | 0.04 | -186.21 | -3.95 |
| <b>N1P1-2H</b> | -189.23 | 0.64 | 0.14 | -188.73 | -3.17 |
| <b>N1P1-3H</b> | -192.22 | 1.01 | 0.16 | -191.38 | -2.51 |

#### Enzymatic NRR mechanism on Hf<sub>2</sub>

| <b>System</b>  | <b>Energy</b> | <b>ZPE</b> | <b>TS</b> | <b>G</b> | <b>ΔG</b> |
|----------------|---------------|------------|-----------|----------|-----------|
| <b>N2P3</b>    | -190.86       | 0.20       | 0.09      | -190.74  | -2.92     |
| <b>N2P3-1H</b> | -194.78       | 0.48       | 0.08      | -194.39  | -3.27     |
| <b>N2P3-2H</b> | -198.22       | 0.81       | 0.13      | -197.54  | -3.12     |
| <b>N2P3-3H</b> | -201.02       | 1.13       | 0.11      | -199.99  | -2.27     |
| <b>N2P3-4H</b> | -207.38       | 1.28       | 0.30      | -206.39  | -5.38     |
| <b>N1P1-2H</b> | -189.23       | 0.64       | 0.14      | -188.73  | -3.17     |
| <b>N1P1-3H</b> | -192.22       | 1.01       | 0.16      | -191.38  | -2.51     |

#### Alternating NRR mechanism on Ta<sub>2</sub>

| <b>System</b>  | <b>Energy</b> | <b>ZPE</b> | <b>TS</b> | <b>G</b> | <b>ΔG</b> |
|----------------|---------------|------------|-----------|----------|-----------|
| <b>N2P1</b>    | -191.25       | 0.20       | 0.10      | -191.15  | -1.15     |
| <b>N2P1-1H</b> | -194.58       | 0.49       | 0.17      | -194.26  | -0.95     |
| <b>N2P1-2H</b> | -197.77       | 0.80       | 0.21      | -197.18  | -0.57     |
| <b>N2P1-3H</b> | -202.48       | 1.13       | 0.22      | -201.58  | -1.67     |
| <b>N2P1-4H</b> | -205.35       | 1.49       | 0.21      | -204.07  | -0.86     |
| <b>N1P1-2H</b> | -191.50       | 0.67       | 0.11      | -190.4   | -3.19     |
| <b>N1P1-3H</b> | -194.34       | 1.02       | 0.14      | -193.46  | -2.41     |

#### Distal NRR mechanism on Ta<sub>2</sub>

| <b>System</b>  | <b>Energy</b> | <b>ZPE</b> | <b>TS</b> | <b>G</b> | <b>ΔG</b> |
|----------------|---------------|------------|-----------|----------|-----------|
| <b>N2P1</b>    | -191.25       | 0.20       | 0.10      | -191.15  | -1.15     |
| <b>N2P1-1H</b> | -194.58       | 0.49       | 0.17      | -194.26  | -0.95     |
| <b>N2P1-2H</b> | -198.34       | 0.80       | 0.13      | -197.67  | -1.07     |
| <b>N1P1</b>    | -184.28       | 0.09       | 0.04      | -184.22  | -3.07     |
| <b>N1P1-1H</b> | -186.85       | 0.35       | 0.10      | -186.59  | -2.14     |
| <b>N1P1-2H</b> | -191.50       | 0.67       | 0.11      | -190.4   | -3.19     |
| <b>N1P1-3H</b> | -194.34       | 1.02       | 0.14      | -193.46  | -2.41     |

#### Enzymatic NRR mechanism on Ta<sub>2</sub>

| <b>System</b>  | <b>Energy</b> | <b>ZPE</b> | <b>TS</b> | <b>G</b> | <b>ΔG</b> |
|----------------|---------------|------------|-----------|----------|-----------|
| <b>N2P1</b>    | -192.42       | 0.21       | 0.07      | -192.28  | -2.28     |
| <b>N2P1-1H</b> | -196.10       | 0.50       | 0.10      | -195.70  | -2.39     |
| <b>N2P1-2H</b> | -199.73       | 0.79       | 0.14      | -199.08  | -2.48     |
| <b>N2P1-3H</b> | -205.36       | 1.01       | 0.21      | -204.56  | -4.65     |
| <b>N2P1-4H</b> | -209.73       | 1.33       | 0.23      | -208.63  | -5.42     |
| <b>N1P1-2H</b> | -191.50       | 0.67       | 0.11      | -190.4   | -3.19     |
| <b>N1P1-3H</b> | -194.34       | 1.02       | 0.14      | -193.46  | -2.41     |

#### Alternating NRR mechanism on W<sub>2</sub>

| System  | Energy  | ZPE  | TS   | G       | $\Delta G$ |
|---------|---------|------|------|---------|------------|
| N2P1    | -192.25 | 0.23 | 0.09 | -192.11 | -0.60      |
| N2P1-1H | -195.21 | 0.49 | 0.16 | -194.89 | -0.07      |
| N2P1-2H | -198.69 | 0.82 | 0.18 | -198.05 | 0.07       |
| N2P1-3H | -203.07 | 1.05 | 0.16 | -202.18 | -0.77      |
| N2P1-4H | -206.49 | 1.49 | 0.23 | -205.22 | -0.51      |
| N1P1-2H | -191.94 | 0.73 | 0.07 | -191.27 | -2.01      |
| N1P1-3H | -195.44 | 1.02 | 0.18 | -194.60 | -2.03      |

#### Distal NRR mechanism on $W_2$

| System  | Energy  | ZPE  | TS   | G       | $\Delta G$ |
|---------|---------|------|------|---------|------------|
| N2P1    | -192.25 | 0.23 | 0.09 | -192.11 | -0.60      |
| N2P1-1H | -195.21 | 0.49 | 0.16 | -194.89 | -0.07      |
| N2P1-2H | -199.30 | 0.81 | 0.18 | -198.67 | -0.55      |
| N1P1    | -183.28 | 0.08 | 0.06 | -183.26 | -0.60      |
| N1P1-1H | -187.84 | 0.36 | 0.08 | -187.56 | -1.60      |
| N1P1-2H | -191.94 | 0.73 | 0.07 | -191.27 | -2.01      |
| N1P1-3H | -195.44 | 1.02 | 0.18 | -194.60 | -2.03      |

#### Enzymatic NRR mechanism on $W_2$

| System  | Energy  | ZPE  | TS   | G       | $\Delta G$ |
|---------|---------|------|------|---------|------------|
| N2P1    | -192.03 | 0.19 | 0.08 | -191.93 | -0.41      |
| N2P1-1H | -195.95 | 0.50 | 0.11 | -195.56 | -0.74      |
| N2P1-2H | -199.68 | 0.80 | 0.14 | -199.02 | -0.90      |
| N2P1-3H | -205.87 | 1.05 | 0.16 | -204.98 | -3.57      |
| N2P1-4H | -209.57 | 1.36 | 0.19 | -208.40 | -3.68      |
| N1P1-2H | -191.94 | 0.73 | 0.07 | -191.27 | -2.01      |
| N1P1-3H | -195.44 | 1.02 | 0.18 | -194.60 | -2.03      |

**Table S6.** Energy, ZPE, TS, G and  $\Delta G$  of reaction steps of NRR on  $Re_2$  DAC along alternating and distal mechanisms

#### Alternating NRR mechanism on $Re_2$

| System  | Energy  | ZPE  | TS   | G       | $\Delta G$ |
|---------|---------|------|------|---------|------------|
| N2P1    | -190.81 | 0.22 | 0.14 | -190.73 | -0.81      |
| N2P1-1H | -193.62 | 0.49 | 0.16 | -193.29 | -0.07      |
| N2P1-2H | -197.47 | 0.85 | 0.15 | -196.78 | -0.26      |
| N2P1-3H | -201.24 | 1.13 | 0.11 | -200.22 | -0.40      |
| N2P1-4H | -205.17 | 1.51 | 0.19 | -203.84 | -0.71      |
| N1P1-2H | -190.12 | 0.69 | 0.06 | -189.48 | -1.81      |
| N1P1-3H | -194.04 | 1.04 | 0.09 | -193.08 | -2.11      |

**Distal NRR mechanism on Re<sub>2</sub>**

| <b>System</b>  | <b>Energy</b> | <b>ZPE</b> | <b>TS</b> | <b>G</b> | <b>ΔG</b> |
|----------------|---------------|------------|-----------|----------|-----------|
| <b>N2P1</b>    | -190.81       | 0.22       | 0.14      | -190.73  | -0.81     |
| <b>N2P1-1H</b> | -193.62       | 0.49       | 0.16      | -193.29  | -0.07     |
| <b>N2P1-2H</b> | -198.14       | 0.82       | 0.10      | -197.42  | -0.90     |
| <b>N1P1</b>    | -181.90       | 0.09       | 0.06      | -181.87  | -0.80     |
| <b>N1P1-1H</b> | -186.20       | 0.38       | 0.07      | -185.89  | -1.52     |
| <b>N1P1-2H</b> | -190.12       | 0.69       | 0.06      | -189.48  | -1.81     |
| <b>N1P1-3H</b> | -194.04       | 1.04       | 0.09      | -193.08  | -2.11     |
